# Supplementary material for: New withanolides with TRAIL-sensitizing effect from Physalis pubescens L.
Source: Royal Society of Chemistry journal article supplement (doi:10.1039/c6ra07031k), 2016-01-01

## Supporting Information

### New withanolides with TRAIL-sensitizing effect from *Physalis pubescens* L.

Li-Xia Chen,<sup>ab</sup> Gui-Yang Xia,<sup>ac</sup> Hao He,<sup>d</sup> Jian Huang,<sup>a</sup> Feng Qiu<sup>\*ac</sup> and Xiao-Lin Zi<sup>\*b</sup>

<sup>a</sup>Department of Natural Products Chemistry, School of Traditional Chinese Materia Medica, Key Laboratory of Structure-Based Drug Design & Discovery, Ministry of Education, Shenyang Pharmaceutical University, Shenyang 110016, People's Republic of China. E-mail: fengqiu20070118@163.com; Tel.: +86-22-59596223.

<sup>b</sup>Department of Urology, University of California, Irvine, Orange, CA 92868, USA. E-mail: xzi@uci.edu; Tel.: +01-714-456-8316.

<sup>c</sup>School of Chinese Materia Medica and Tianjin State Key Laboratory of Modern Chinese Medicine, Tianjin University of Traditional Chinese Medicine, Tianjin 300193, People's Republic of China

<sup>d</sup>School of Pharmaceutical Sciences, Xi'an Medical University, Xi'an 710021, People's Republic of China

## Contents of Supporting Information

|                                                                                                               |    |
|---------------------------------------------------------------------------------------------------------------|----|
| <b>Figure S1.</b> $^{13}\text{C}$ NMR (75 MHz) spectrum of compound <b>1</b> in $\text{CDCl}_3$ .....         | 1  |
| <b>Figure S2.</b> $^1\text{H}$ NMR (300 MHz) spectrum of compound <b>1</b> in $\text{CDCl}_3$ .....           | 2  |
| <b>Figure S3.</b> HSQC spectrum of compound <b>1</b> in $\text{CDCl}_3$ .....                                 | 3  |
| <b>Figure S4.</b> HMBC spectrum of compound <b>1</b> in $\text{CDCl}_3$ .....                                 | 4  |
| <b>Figure S5.</b> NOESY spectrum of compound <b>1</b> in $\text{CDCl}_3$ .....                                | 5  |
| <b>Figure S6.</b> HRESIMS data of compound <b>1</b> .....                                                     | 6  |
| <b>Figure S7.</b> IR spectrum of compound <b>1</b> .....                                                      | 6  |
| <b>Figure S8.</b> UV spectrum of compound <b>1</b> .....                                                      | 7  |
| <b>Figure S9.</b> The HPLC chromatogram for the purity of compound <b>1</b> .....                             | 7  |
| <b>Figure S10.</b> $^{13}\text{C}$ NMR (150 MHz) spectrum of compound <b>2</b> in $\text{CDCl}_3$ .....       | 8  |
| <b>Figure S11.</b> $^1\text{H}$ NMR (600 MHz) spectrum of compound <b>2</b> in $\text{CDCl}_3$ .....          | 9  |
| <b>Figure S12.</b> HSQC spectrum of compound <b>2</b> in $\text{CDCl}_3$ .....                                | 10 |
| <b>Figure S13.</b> HMBC spectrum of compound <b>2</b> in $\text{CDCl}_3$ .....                                | 11 |
| <b>Figure S14.</b> NOESY spectrum of compound <b>2</b> in $\text{CDCl}_3$ .....                               | 12 |
| <b>Figure S15.</b> HRESIMS data of compound <b>2</b> .....                                                    | 13 |
| <b>Figure S16.</b> IR spectrum of compound <b>2</b> .....                                                     | 13 |
| <b>Figure S17.</b> UV spectrum of compound <b>2</b> .....                                                     | 14 |
| <b>Figure S18.</b> The HPLC chromatogram for the purity of compound <b>2</b> .....                            | 14 |
| <b>Figure S19.</b> $^{13}\text{C}$ NMR (150 MHz) spectrum of compound <b>3</b> in Pyridine- $d_5$ .....       | 15 |
| <b>Figure S20.</b> $^1\text{H}$ NMR (600 MHz) spectrum of compound <b>3</b> in Pyridine- $d_5$ .....          | 16 |
| <b>Figure S21.</b> HSQC spectrum of compound <b>3</b> in Pyridine- $d_5$ .....                                | 17 |
| <b>Figure S22.</b> HMBC spectrum of compound <b>3</b> in Pyridine- $d_5$ .....                                | 18 |
| <b>Figure S23.</b> NOESY spectrum of compound <b>3</b> in Pyridine- $d_5$ .....                               | 19 |
| <b>Figure S24.</b> HRESIMS data of compound <b>3</b> .....                                                    | 20 |
| <b>Figure S25.</b> IR spectrum of compound <b>3</b> .....                                                     | 20 |
| <b>Figure S26.</b> UV spectrum of compound <b>3</b> .....                                                     | 21 |
| <b>Figure S27.</b> The HPLC chromatogram for the purity of compound <b>3</b> .....                            | 21 |
| <b>Figure S28.</b> The UPLC-QTOF-MS chromatogram and MS/MS spectra for compound <b>3</b> .....                | 22 |
| <b>Figure S29.</b> $^{13}\text{C}$ NMR (150 MHz) spectrum of compound <b>4</b> in Pyridine- $d_5$ .....       | 23 |
| <b>Figure S30.</b> $^1\text{H}$ NMR (600 MHz) spectrum of compound <b>4</b> in Pyridine- $d_5$ .....          | 24 |
| <b>Figure S31.</b> HSQC spectrum of compound <b>4</b> in Pyridine- $d_5$ .....                                | 25 |
| <b>Figure S32.</b> HMBC spectrum of compound <b>4</b> in Pyridine- $d_5$ .....                                | 26 |
| <b>Figure S33.</b> HRESIMS data of compound <b>4</b> .....                                                    | 27 |
| <b>Figure S34.</b> IR spectrum of compound <b>4</b> .....                                                     | 27 |
| <b>Figure S35.</b> The HPLC chromatogram for the purity of compound <b>4</b> (refractive index detector)..... | 28 |
| <b>Figure S36.</b> The UPLC-QTOF-MS chromatogram and MS/MS spectra for compound <b>4</b> .....                | 29 |

**Figure S1.**  $^{13}\text{C}$  NMR (75 MHz) spectrum of compound **1** in  $\text{CDCl}_3$

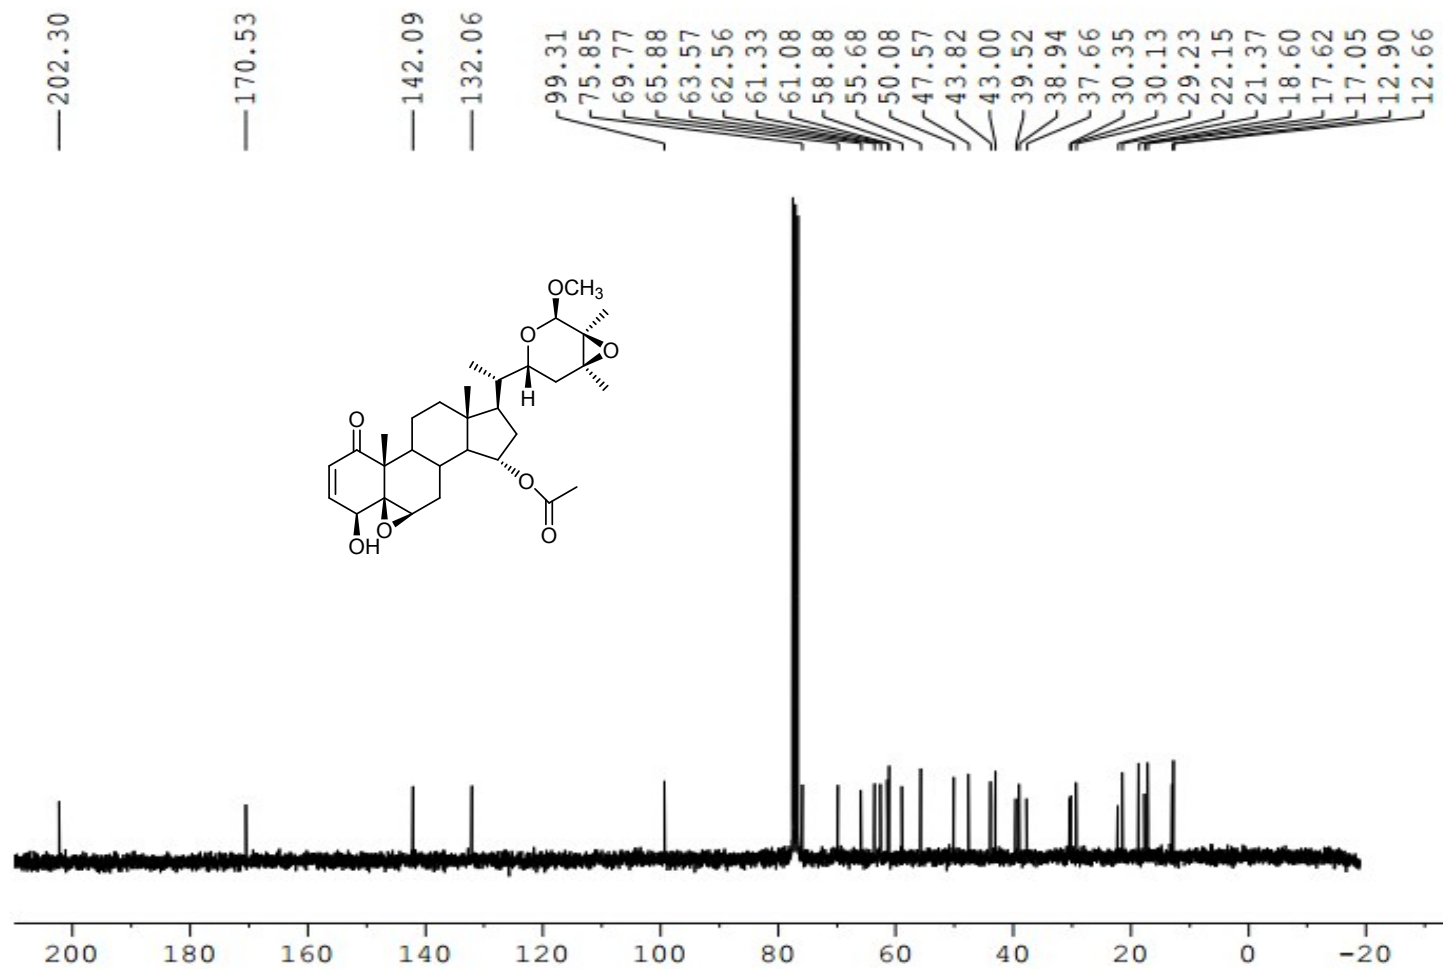

Figure S2. <sup>1</sup>H NMR (300 MHz) spectrum of compound **1** in CDCl<sub>3</sub>

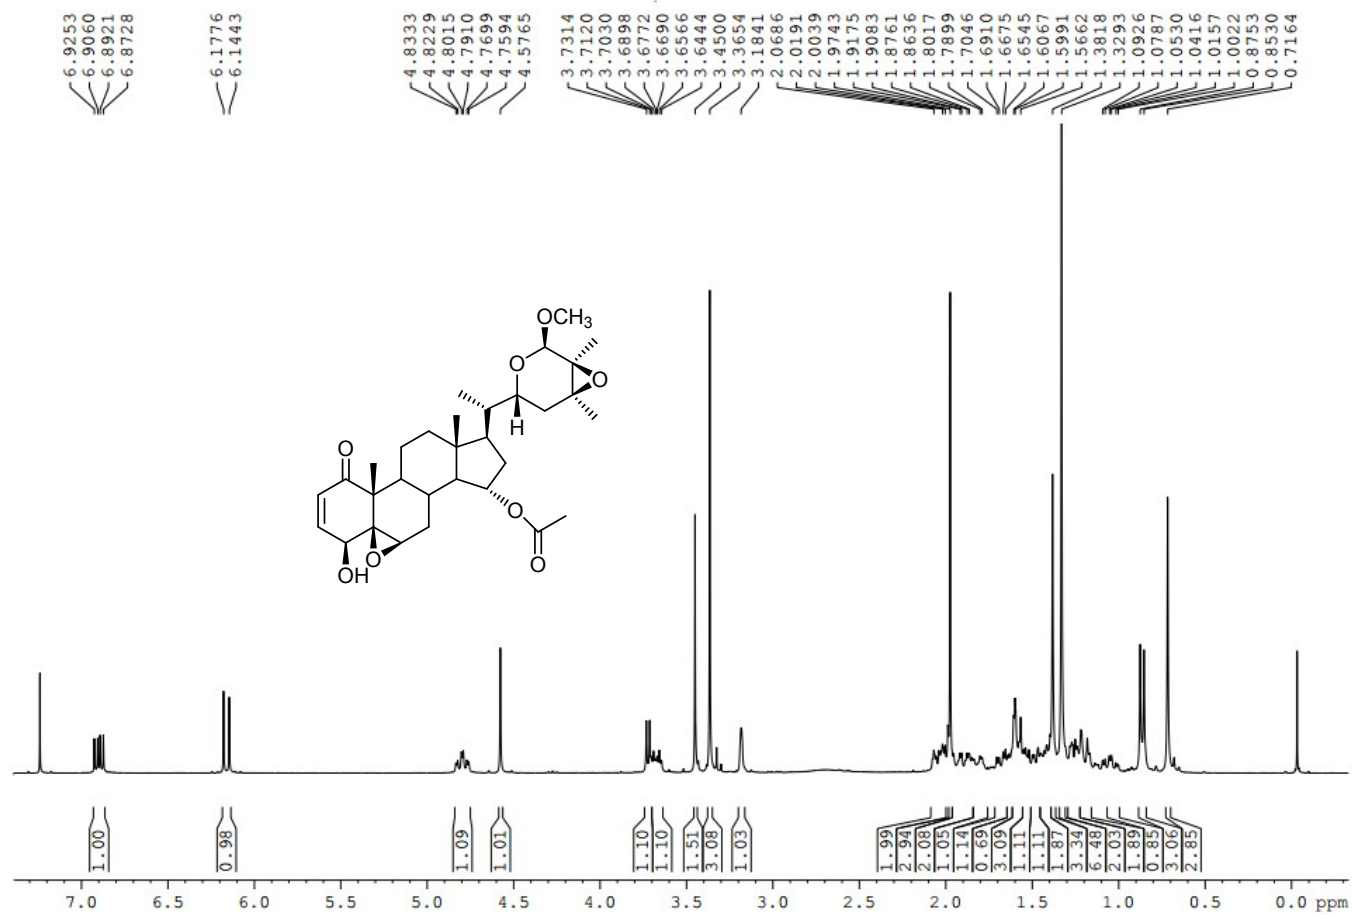

Figure S3. HSQC spectrum of compound 1 in CDCl<sub>3</sub>

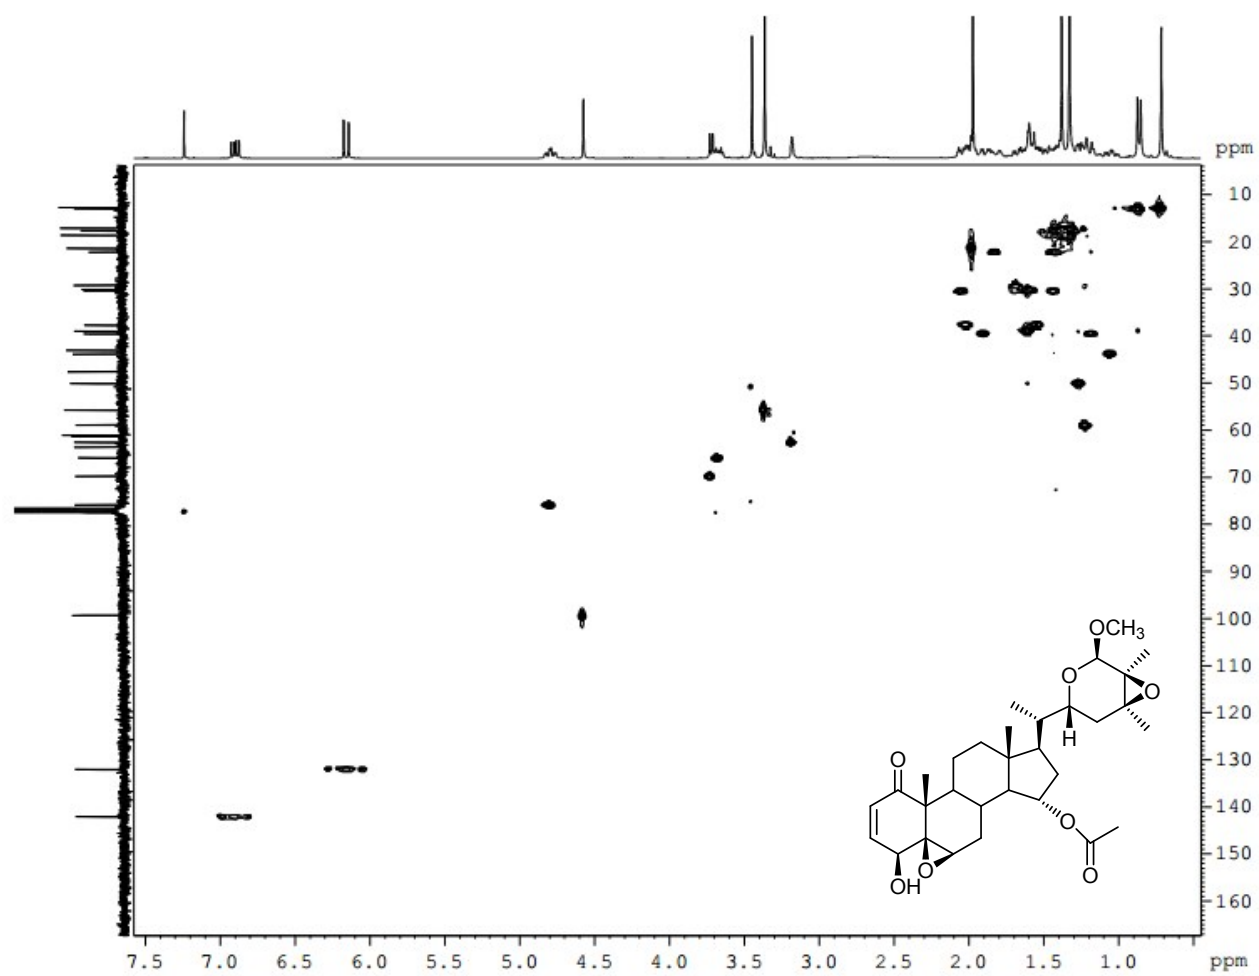

**Figure S4.** HMBC spectrum of compound **1** in CDCl<sub>3</sub>

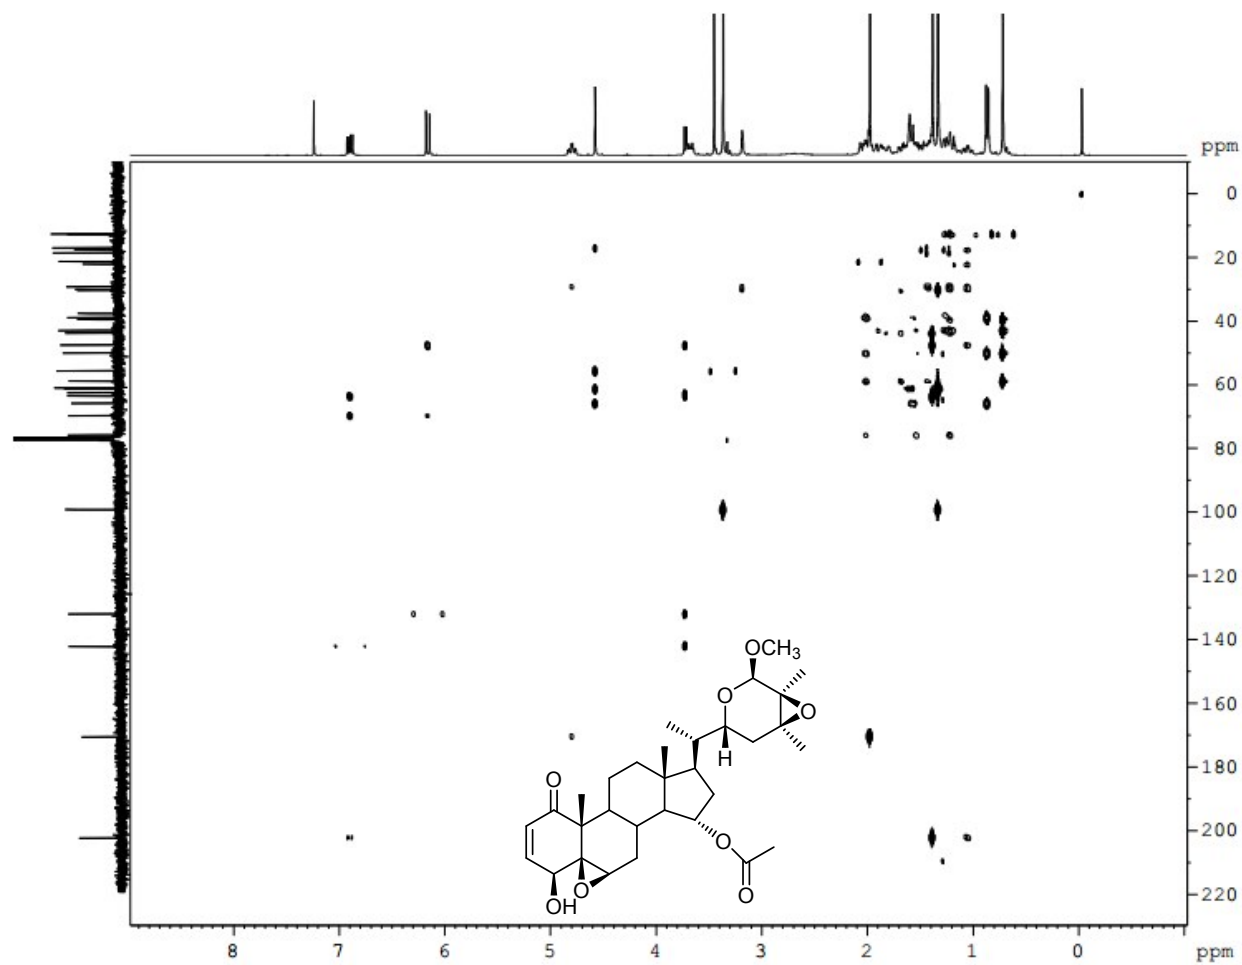

**Figure S5.** NOESY spectrum of compound **1** in CDCl<sub>3</sub>

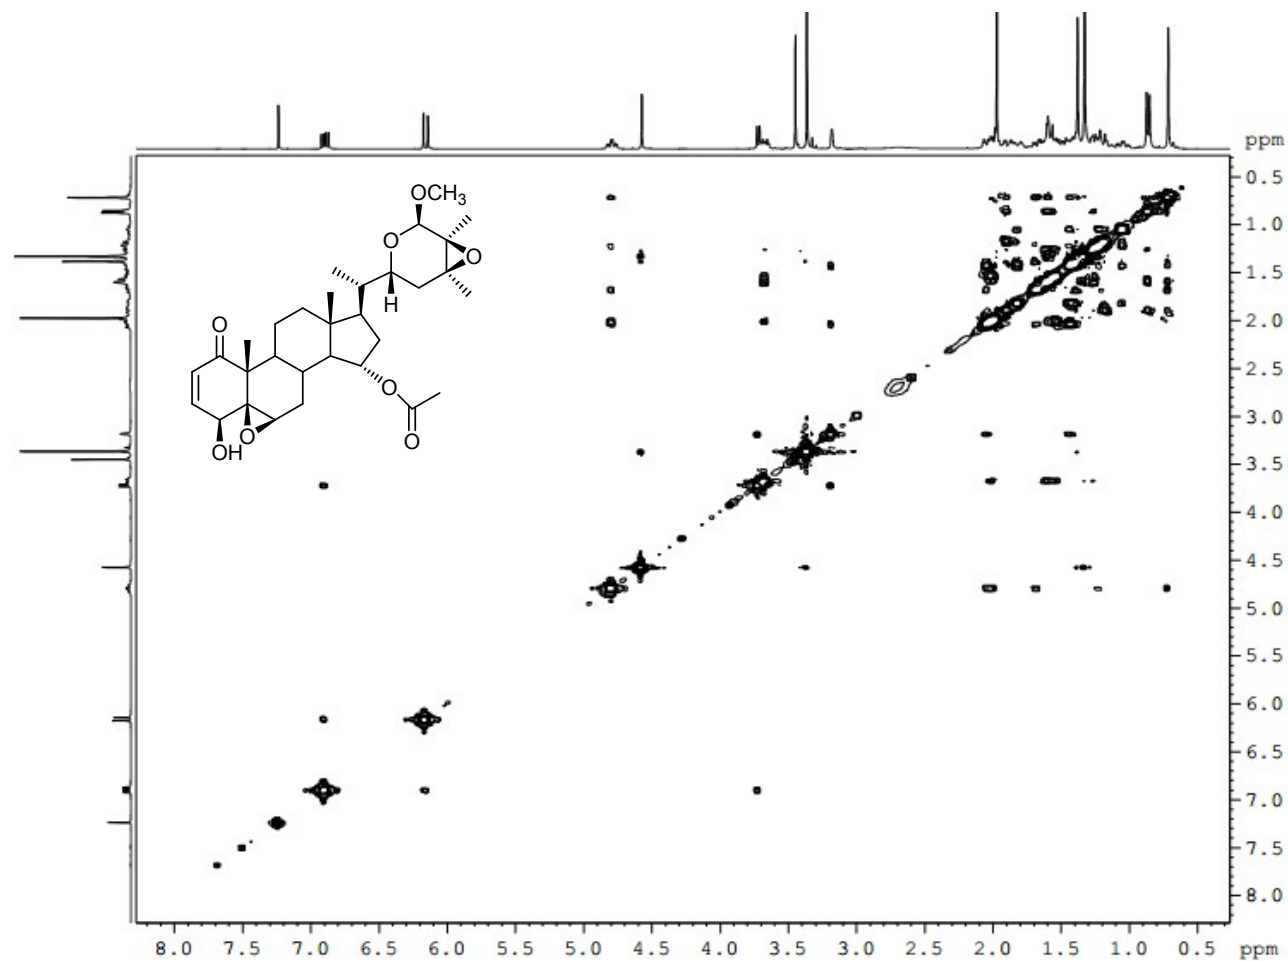

**Figure S6.** HRESIMS data of compound **1**

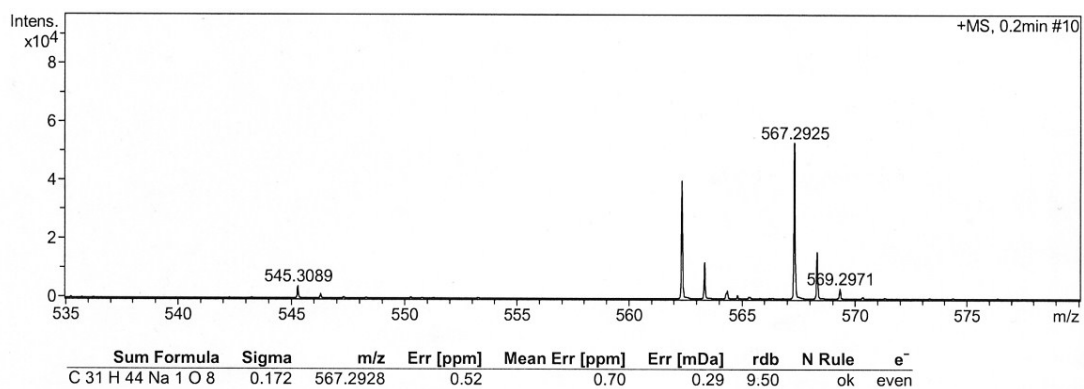

**Figure S7.** IR spectrum of compound **1**

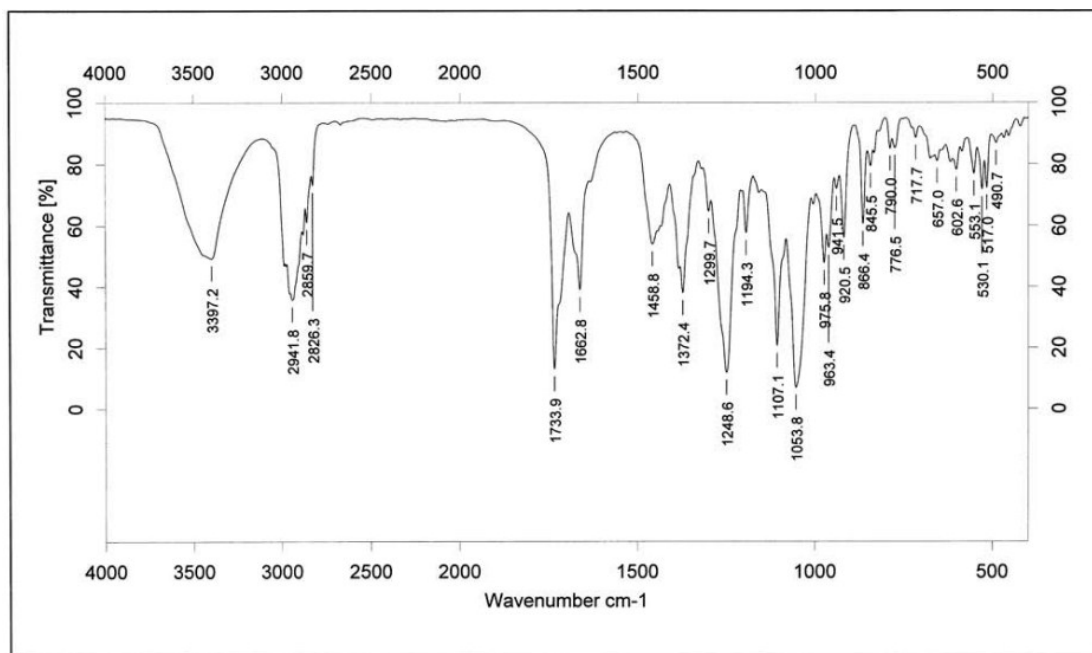



**Figure S8.** UV spectrum of compound **1**

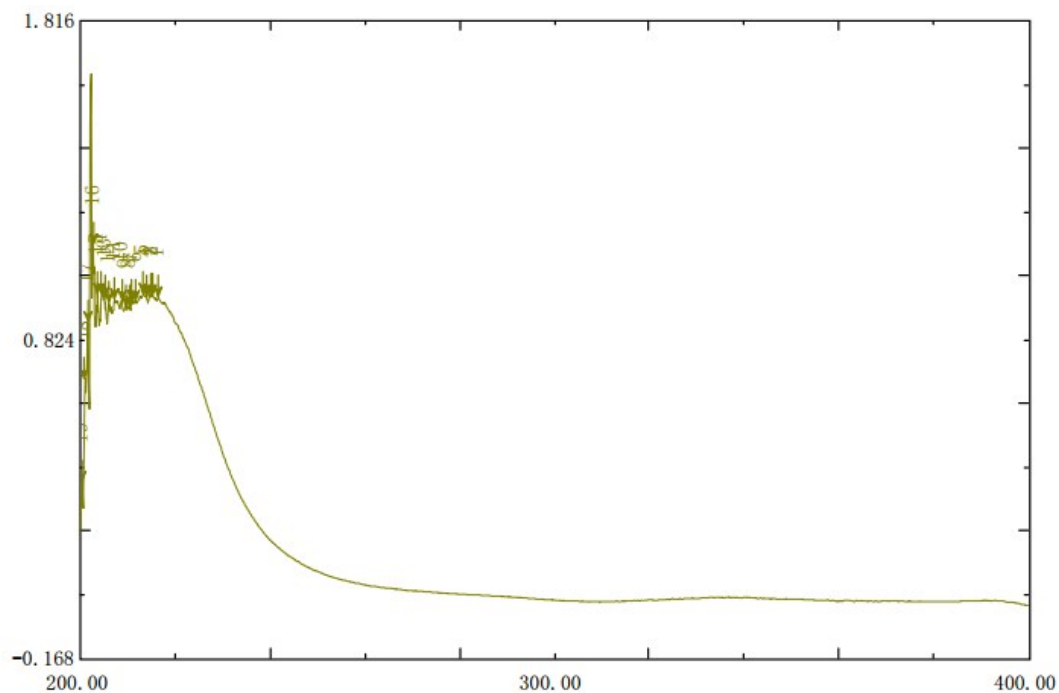

**Figure S9.** The HPLC chromatogram for the purity of compound **1**

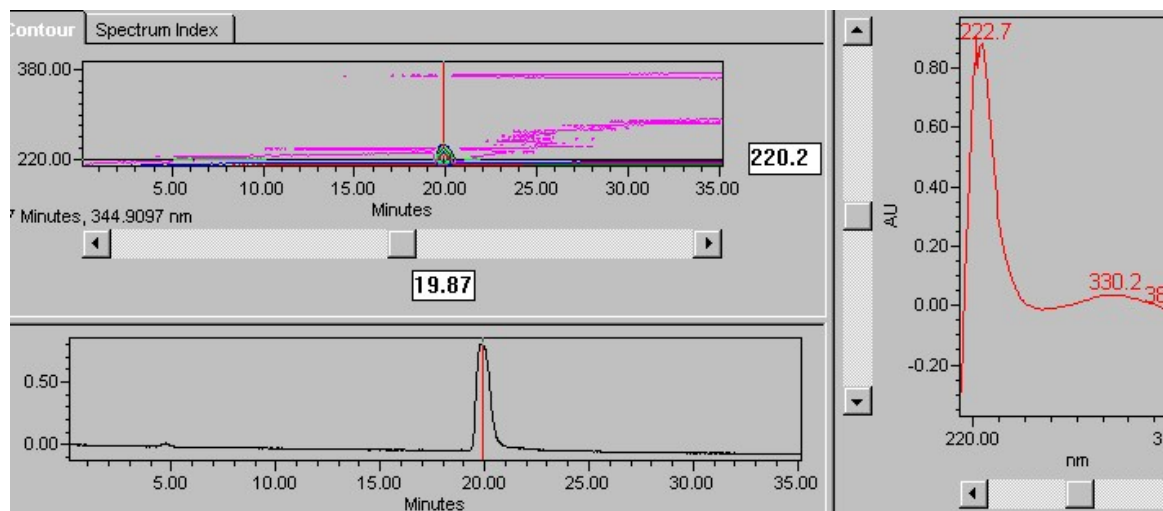

**Figure S10.**  $^{13}\text{C}$  NMR (150 MHz) spectrum of compound **2** in  $\text{CDCl}_3$

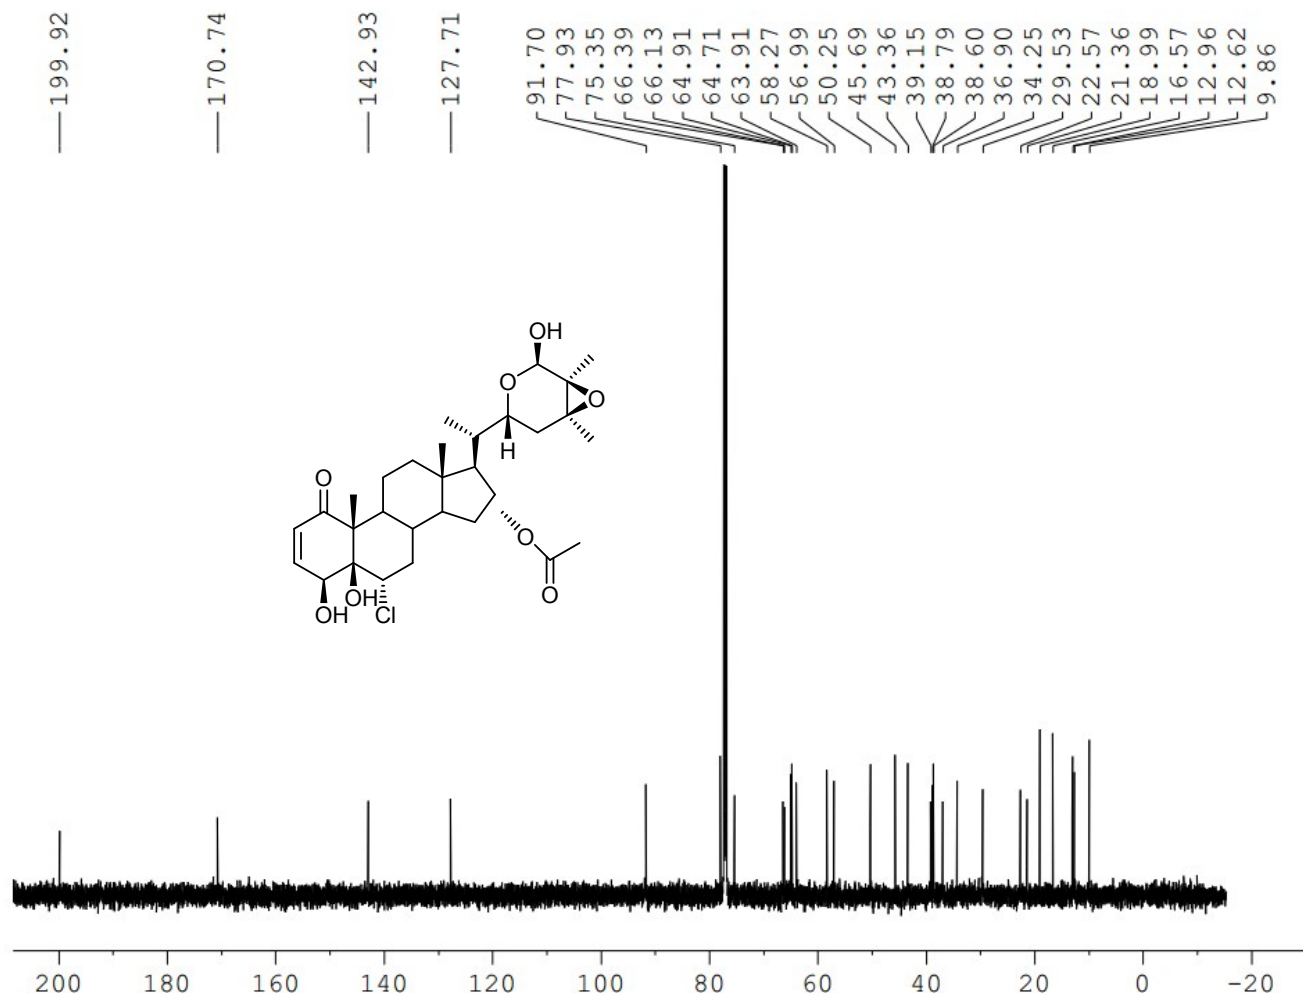

**Figure S11.**  $^1\text{H}$  NMR (600 MHz) spectrum of compound **2** in  $\text{CDCl}_3$

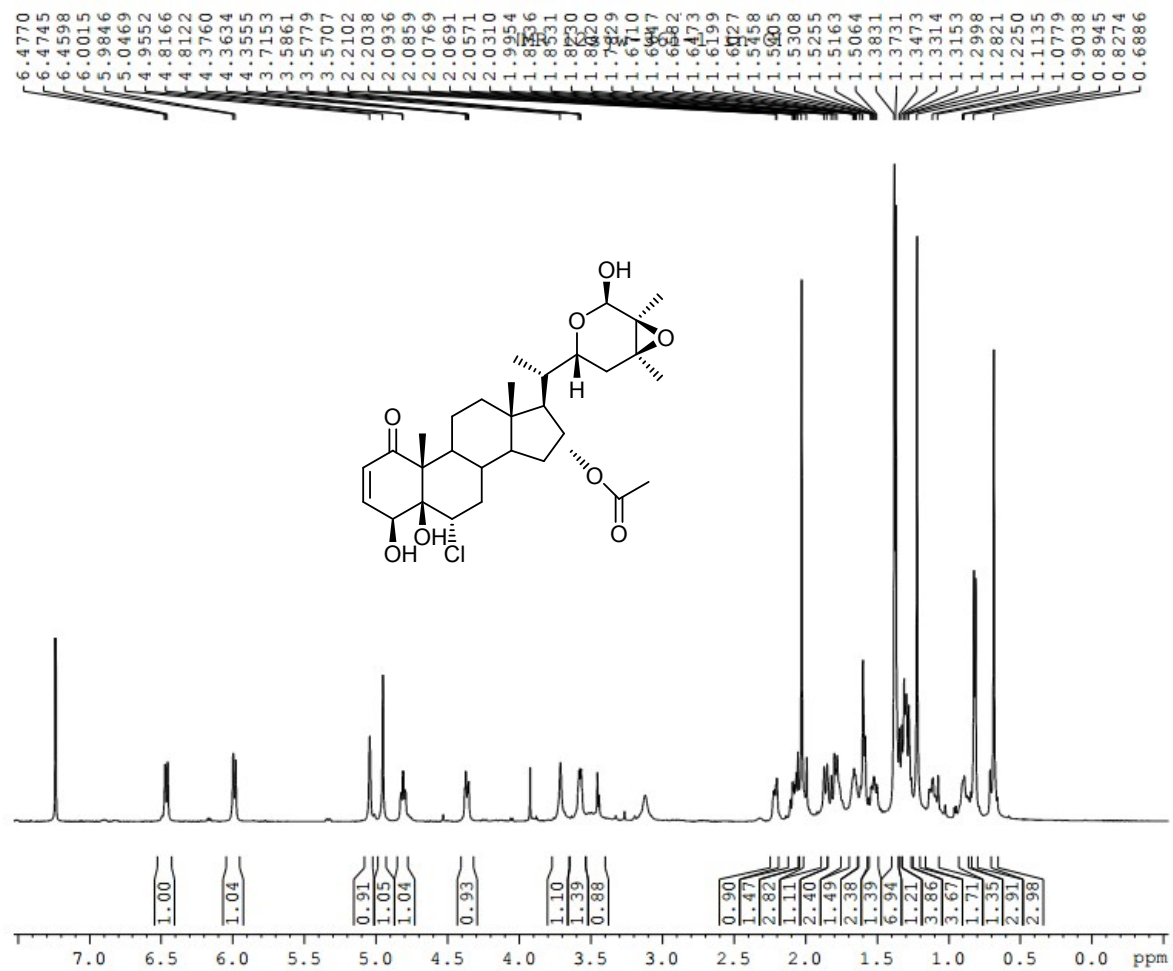

**Figure S12.** HSQC spectrum of compound **2** in CDCl<sub>3</sub>

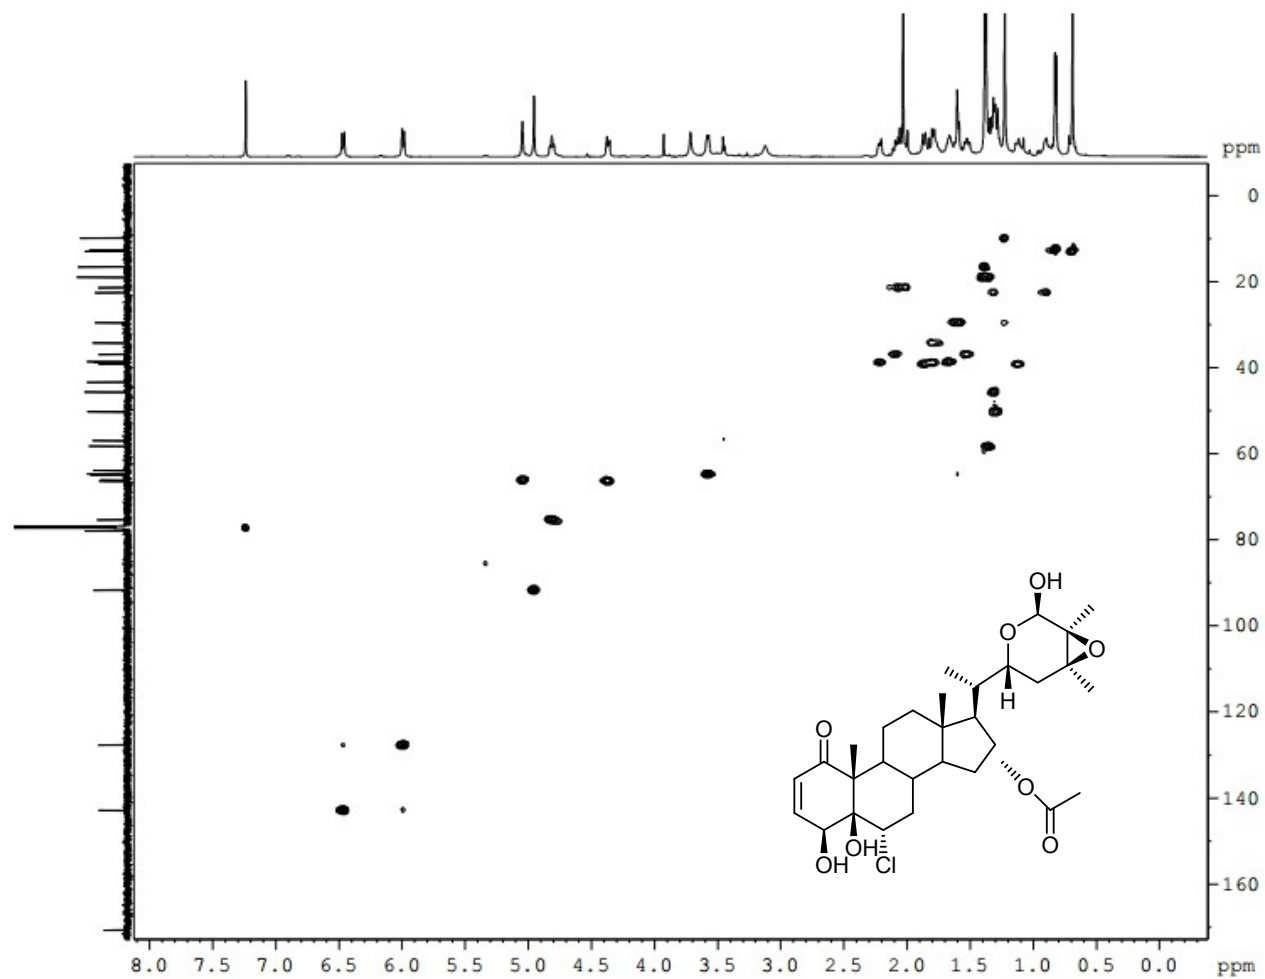

**Figure S13.** HMBC spectrum of compound **2** in CDCl<sub>3</sub>

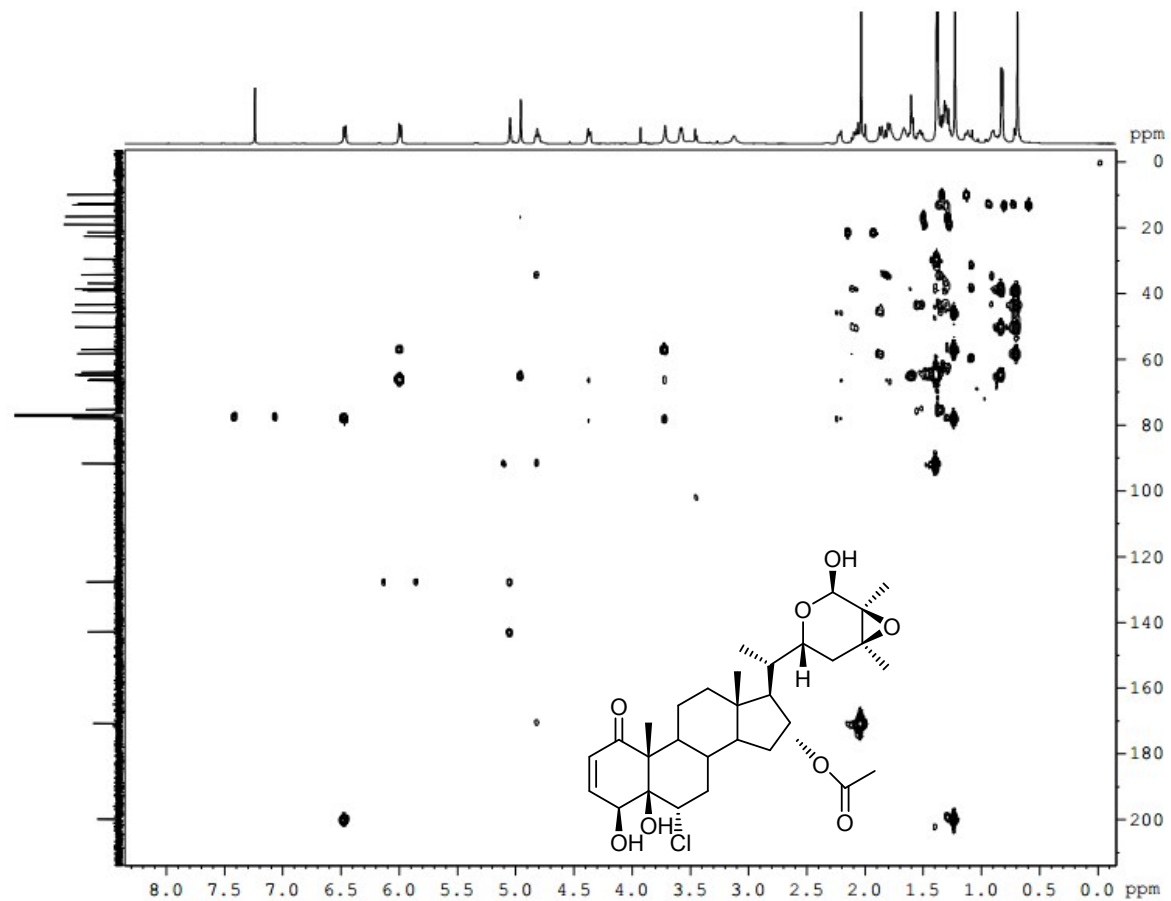

**Figure S14.** NOESY spectrum of compound **2** in CDCl<sub>3</sub>

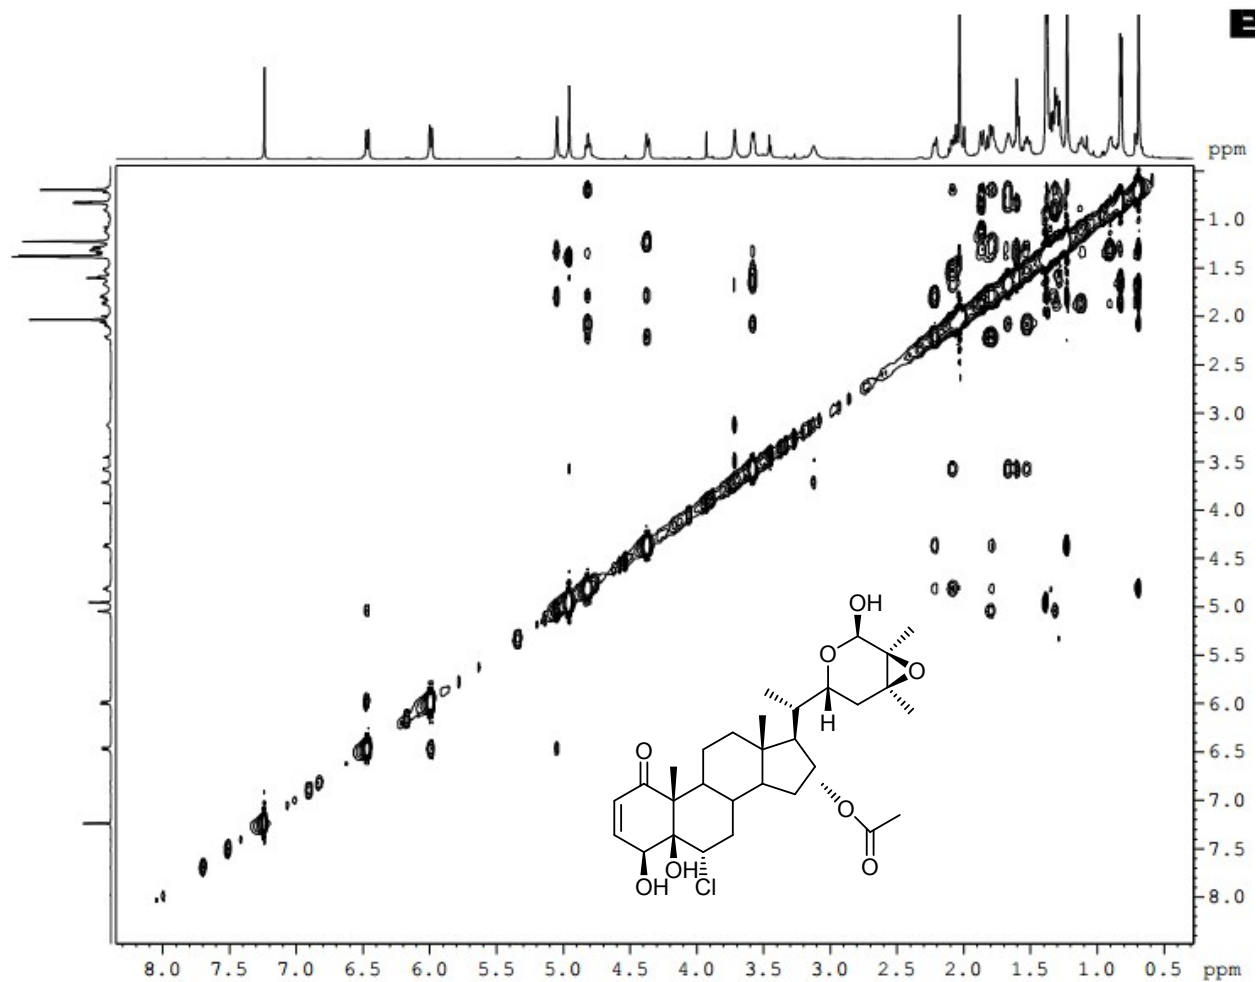

**Figure S15.** HRESIMS data of compound **2**

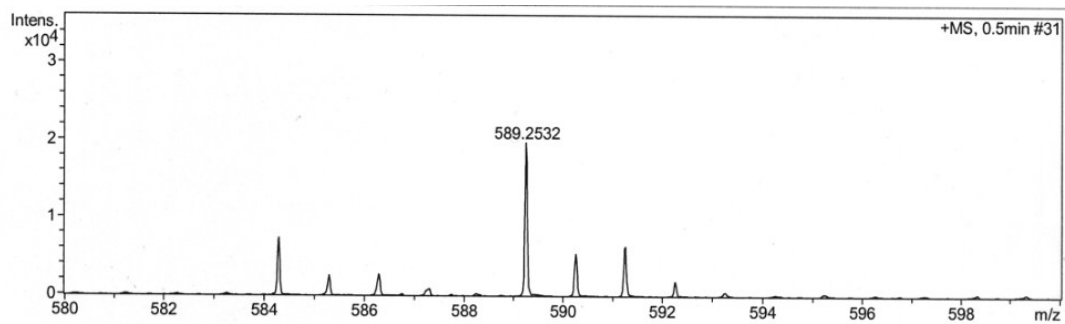

**Figure S16.** IR spectrum of compound **2**

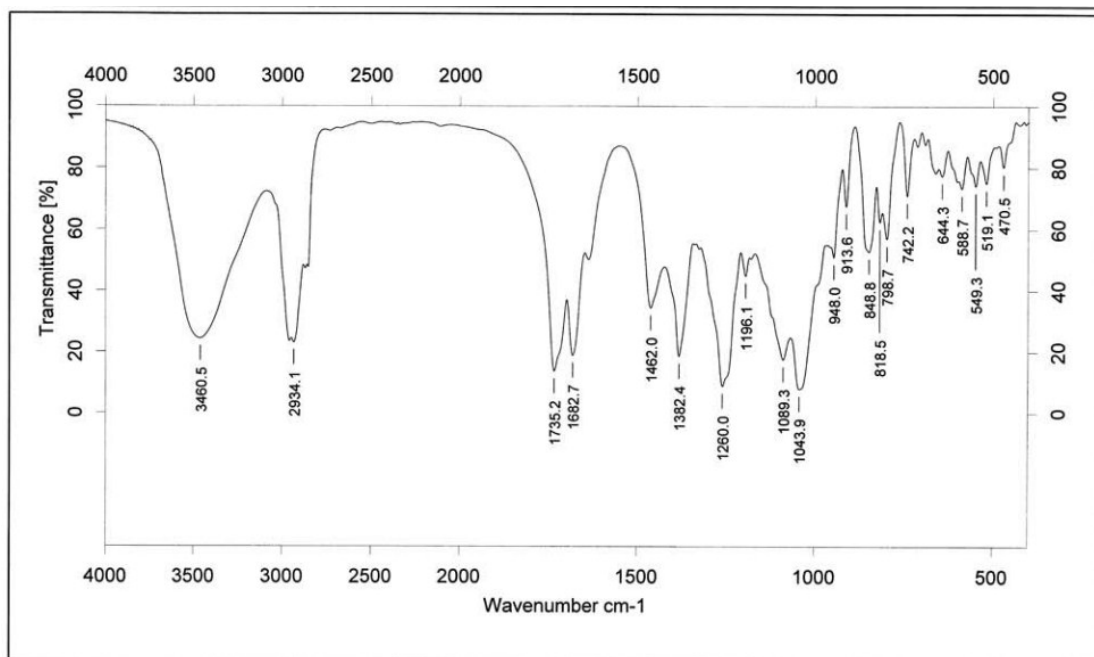

**Figure S17.** UV spectrum of compound 2

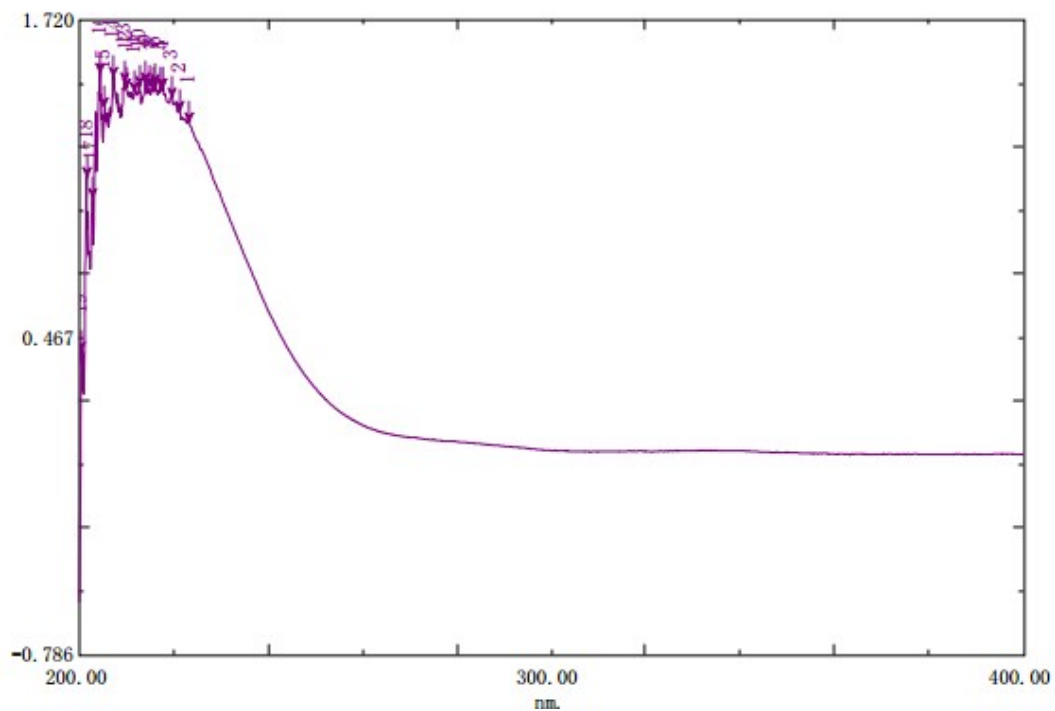

**Figure S18.** The HPLC chromatogram for the purity of compound 2

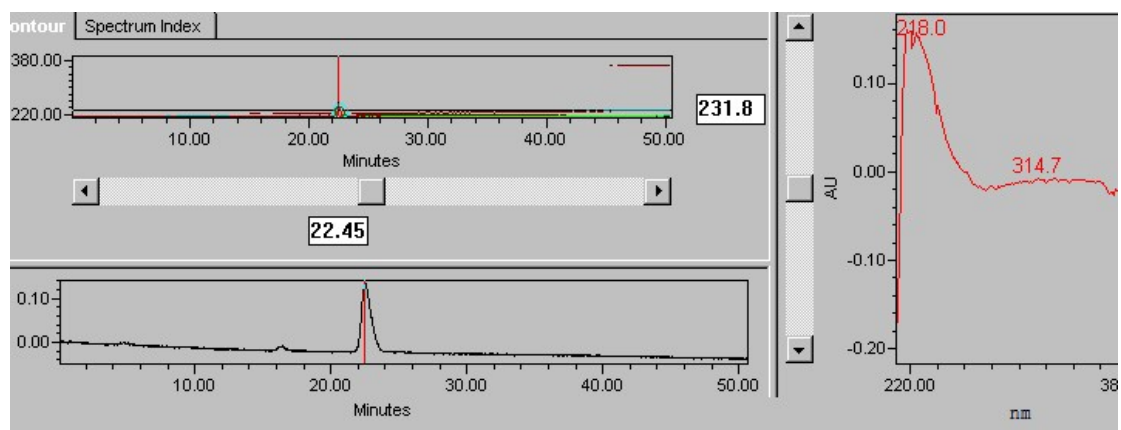



**Figure S19.**  $^{13}\text{C}$  NMR (150 MHz) spectrum of compound **3** in Pyridine- $d_5$

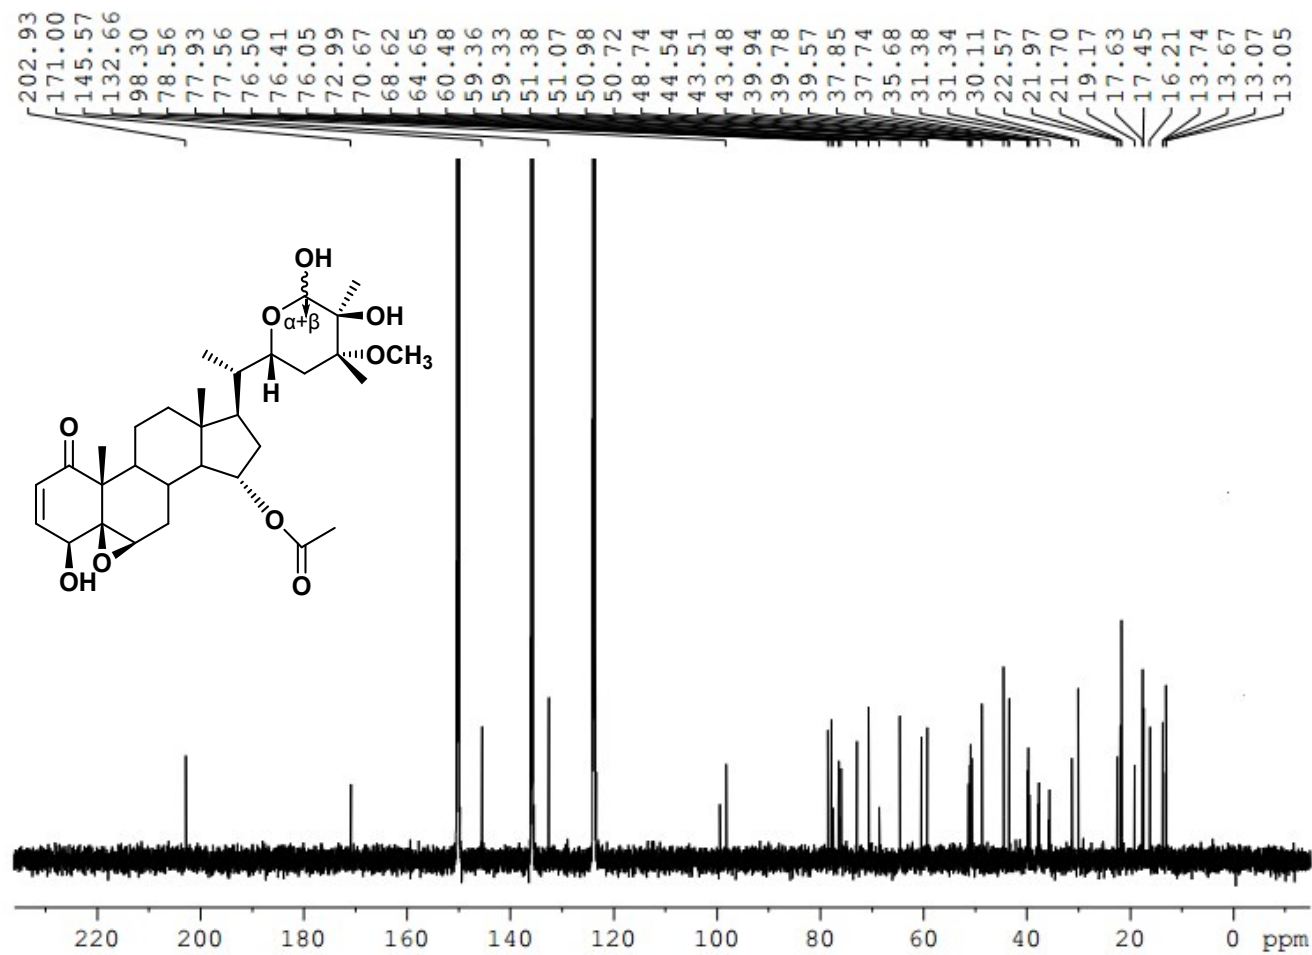

**Figure S20.**  $^1\text{H}$  NMR (600 MHz) spectrum of compound **3** in Pyridine- $d_5$

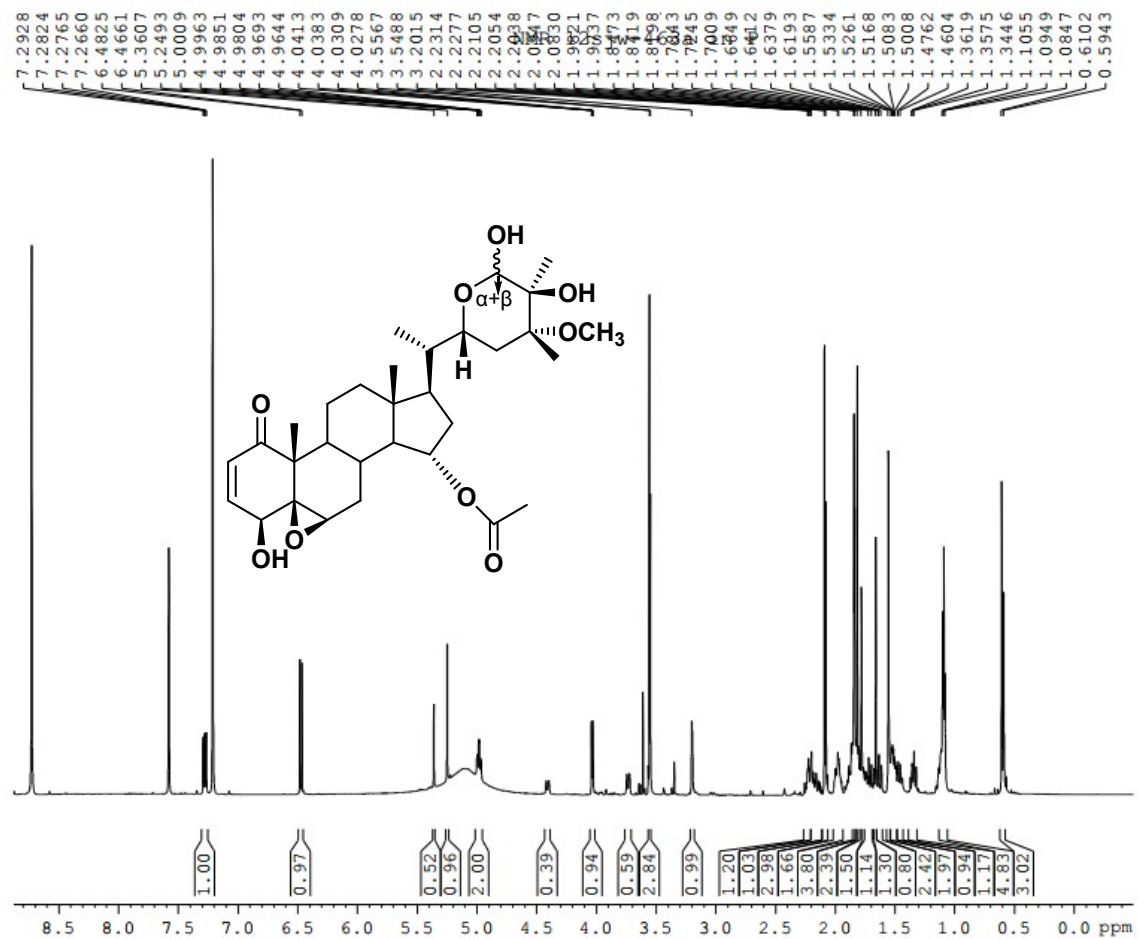

**Figure S21.** HSQC spectrum of compound **3** in Pyridine- $d_5$

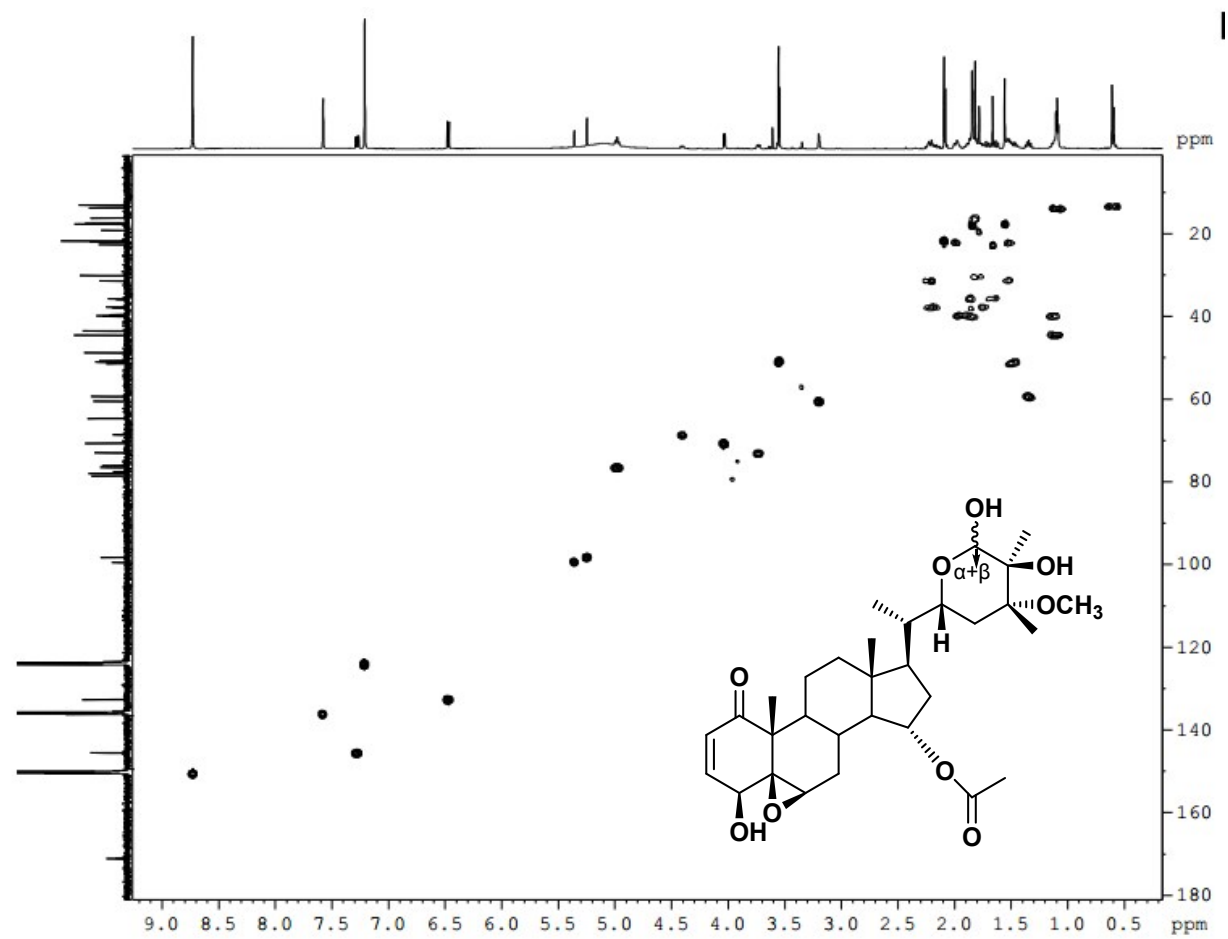

**Figure S22.** HMBC spectrum of compound **3** in Pyridine- $d_5$

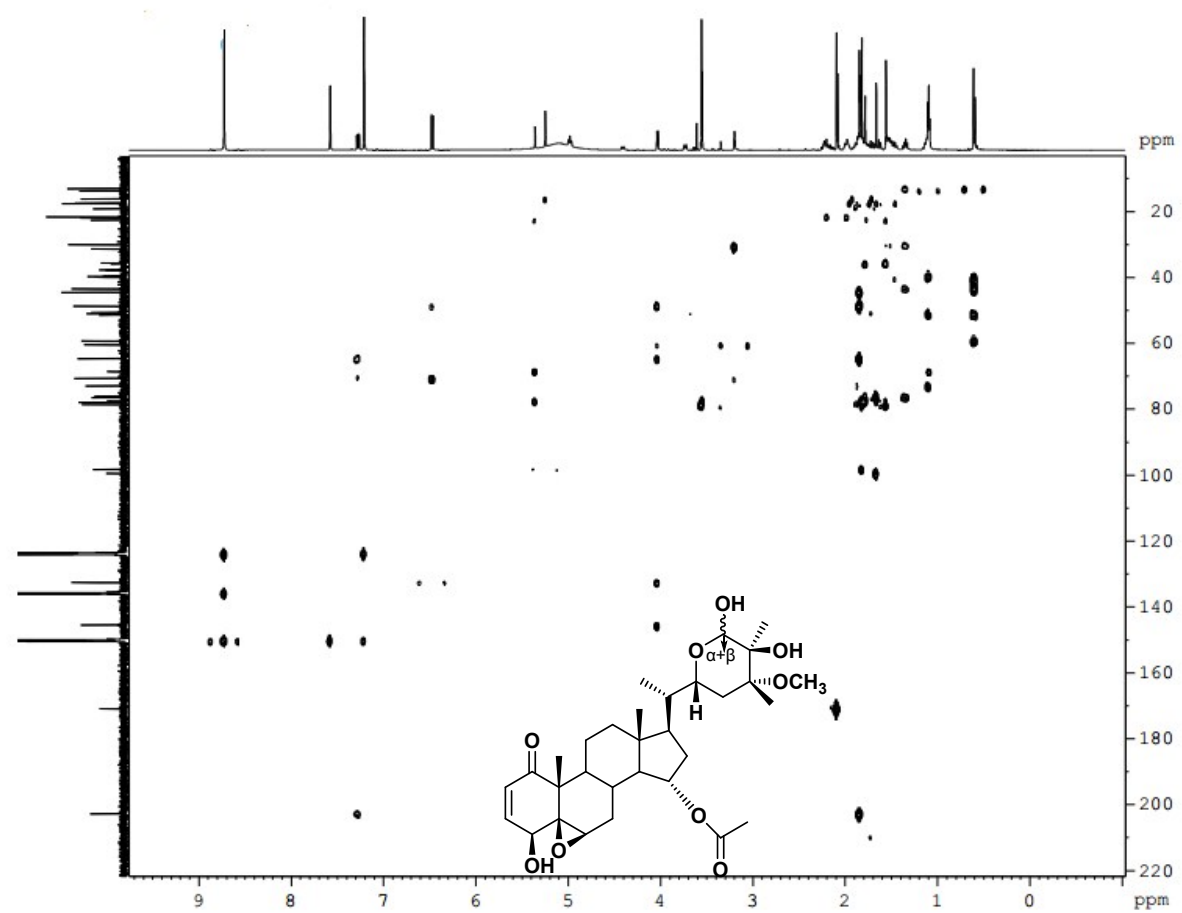

**Figure S23.** NOESY spectrum of compound **3** in Pyridine- $d_5$

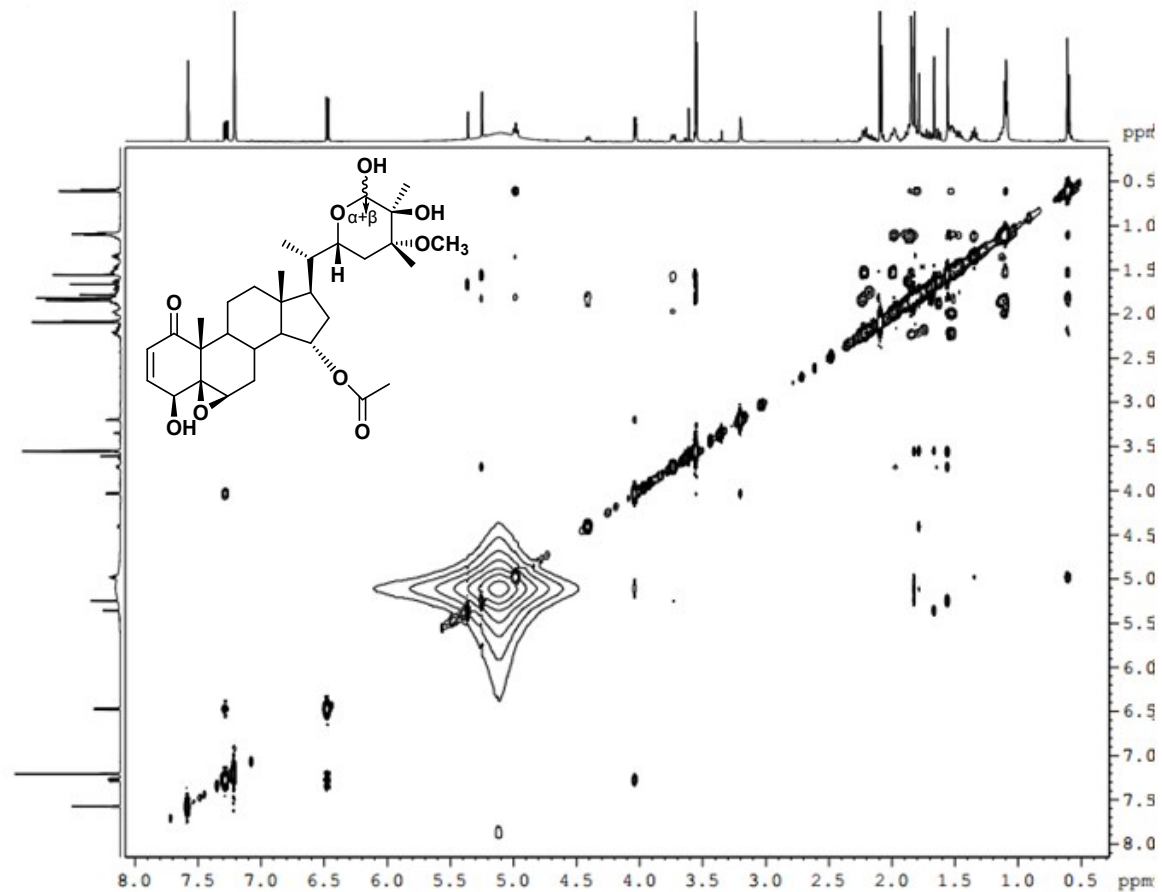

**Figure S24.** HRESIMS data of compound **3**

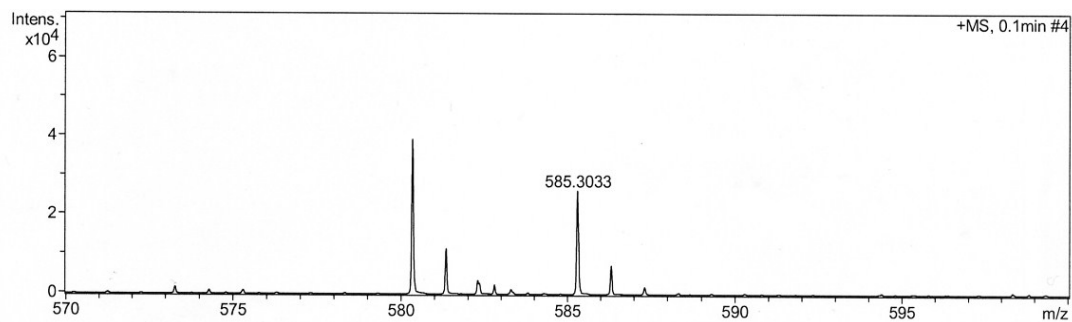

**Figure S25.** IR spectrum of compound **3**

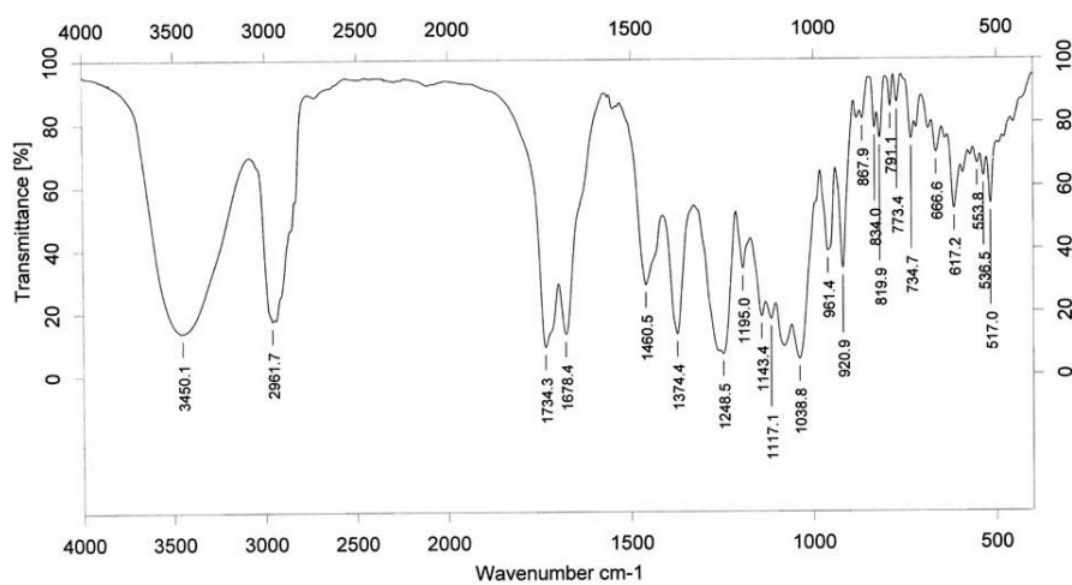

**Figure S26.** UV spectrum of compound 3

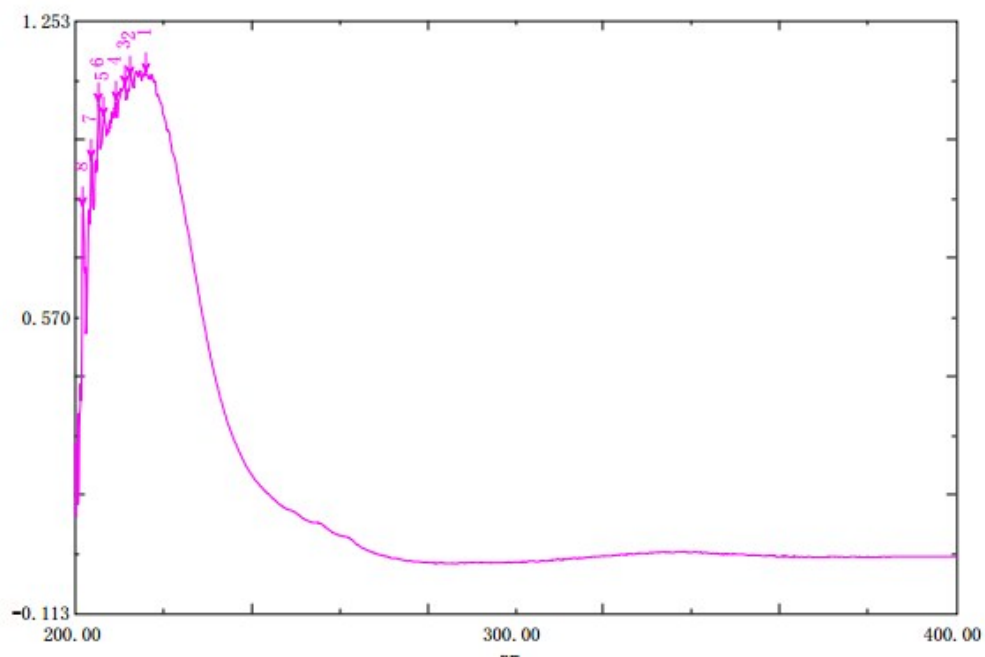

**Figure S27.** The HPLC chromatogram for the purity of compound 3

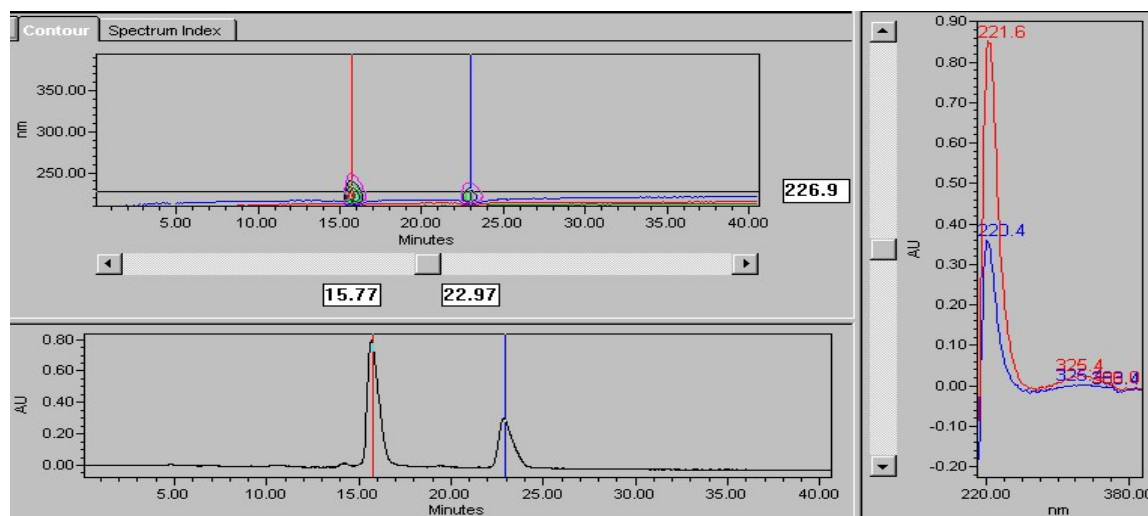

**Figure S28.** The UPLC-QTOF-MS chromatogram and MS/MS spectra for compound 3

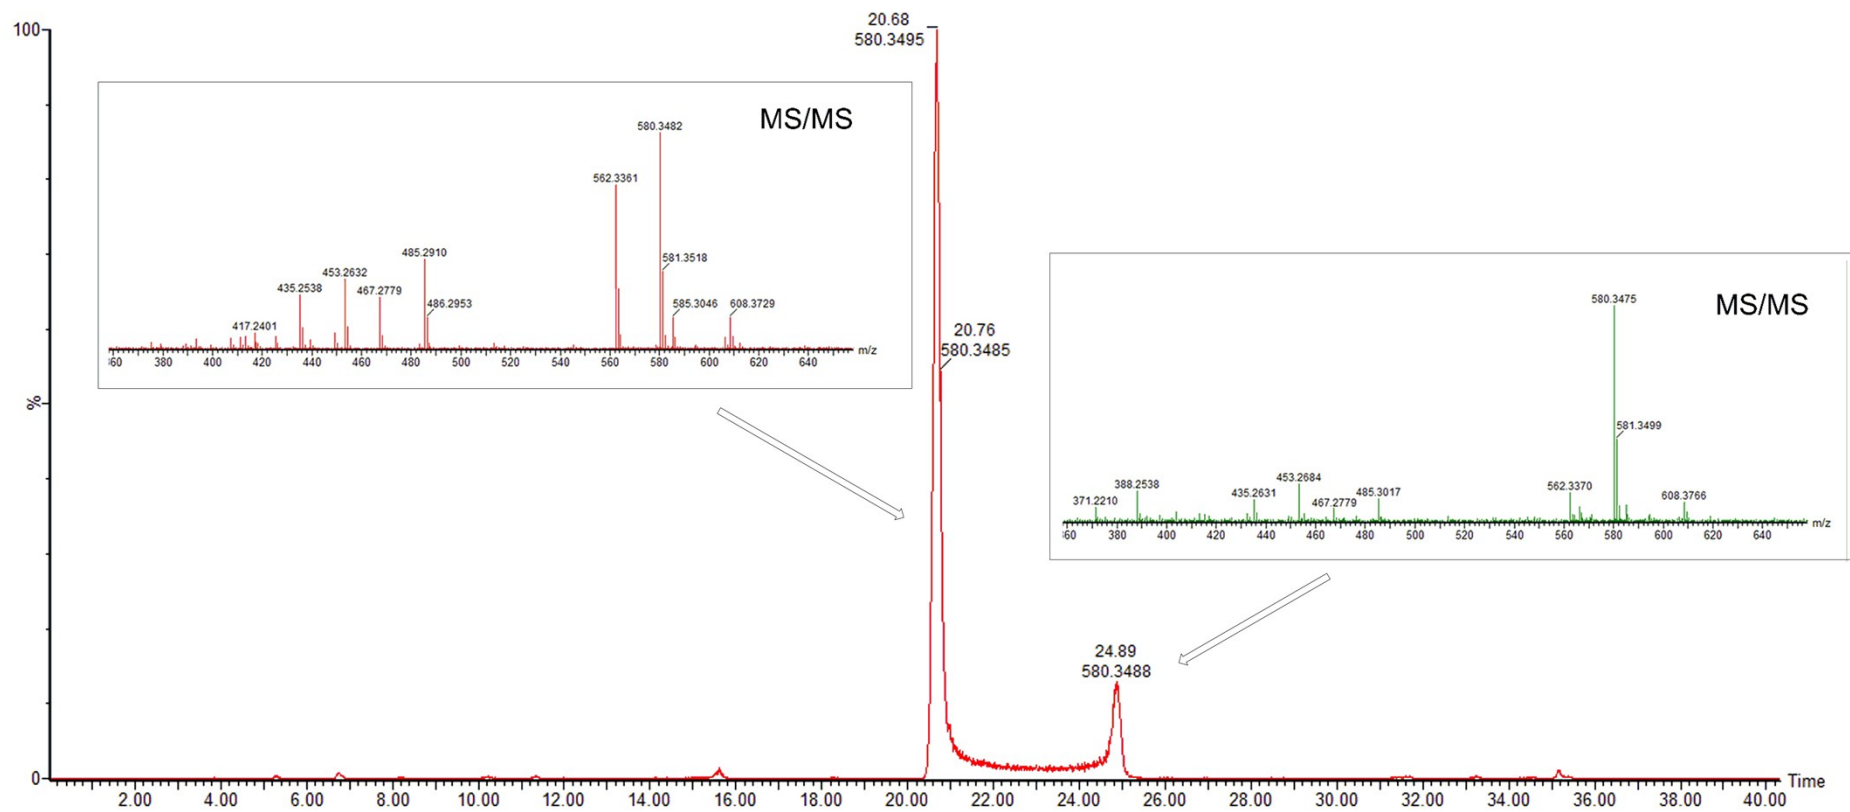



**Figure S29.**  $^{13}\text{C}$  NMR (150 MHz) spectrum of compound **4** in Pyridine- $d_5$

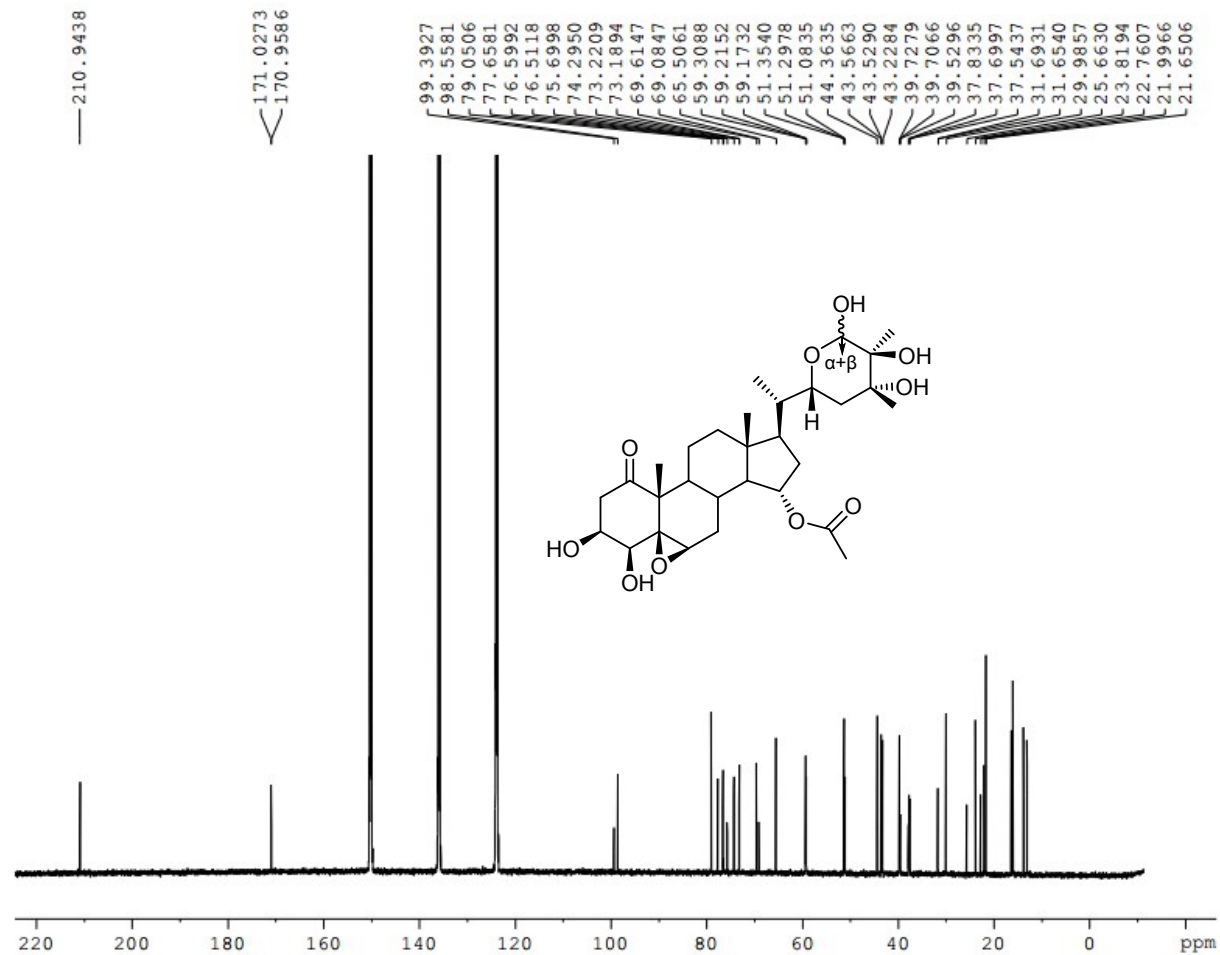

**Figure S30.**  $^1\text{H}$  NMR (600 MHz) spectrum of compound **4** in Pyridine- $d_5$

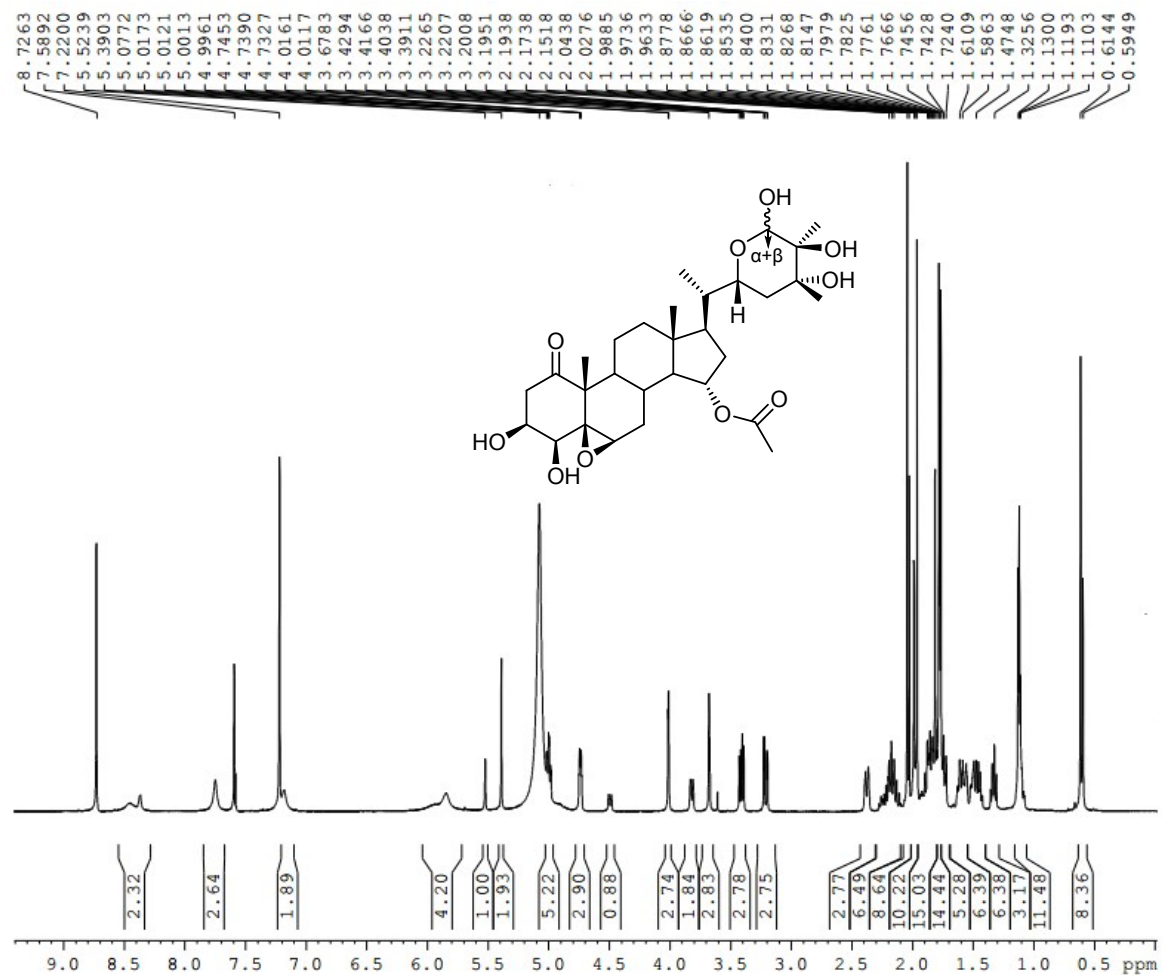

**Figure S31.** HSQC spectrum of compound **4** in Pyridine- $d_5$

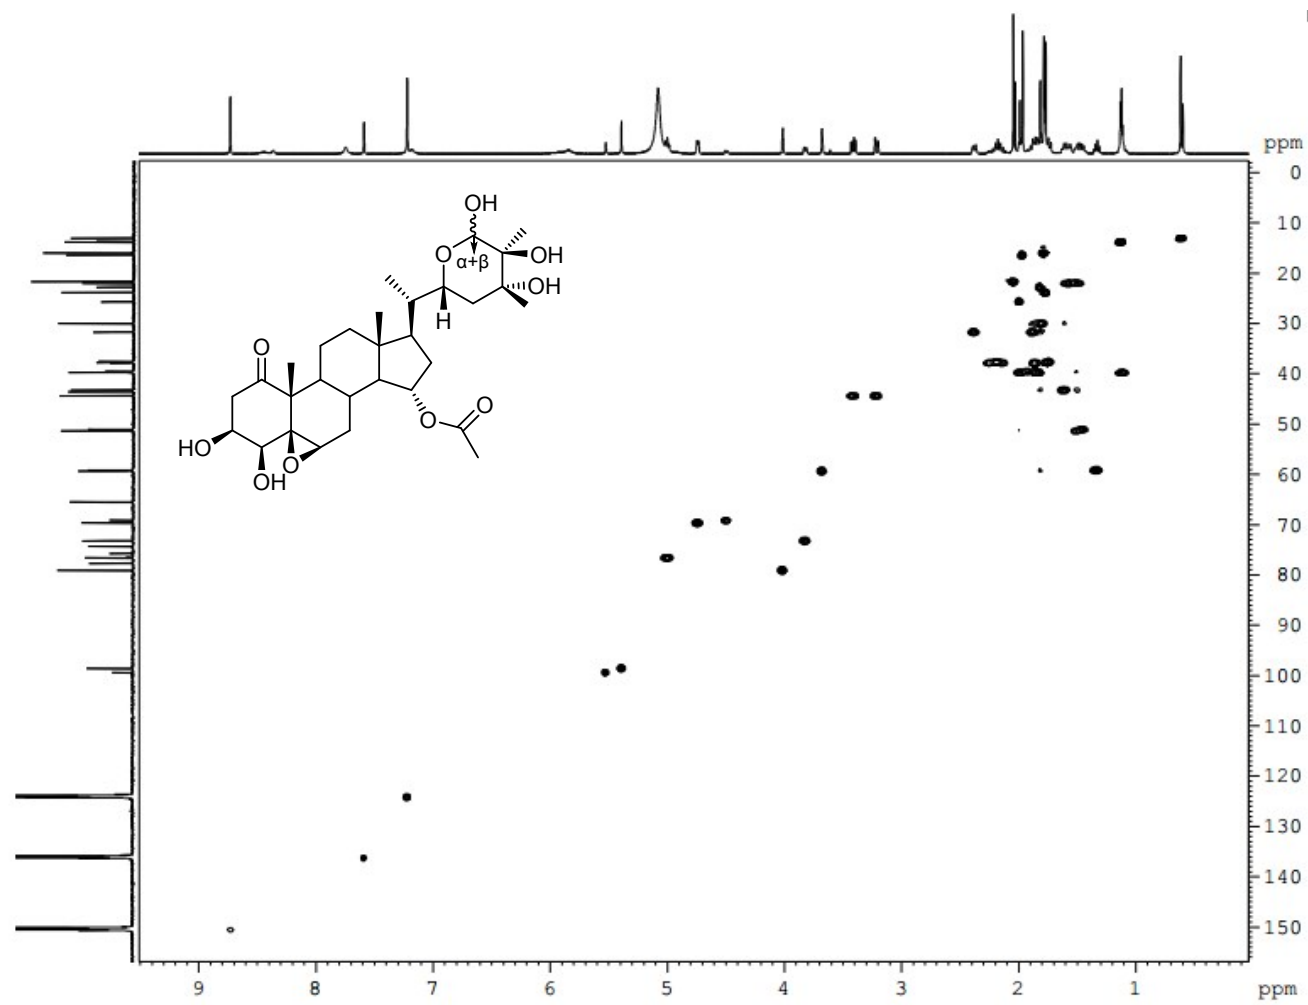

**Figure S32.** HMBC spectrum of compound **4** in Pyridine- $d_5$

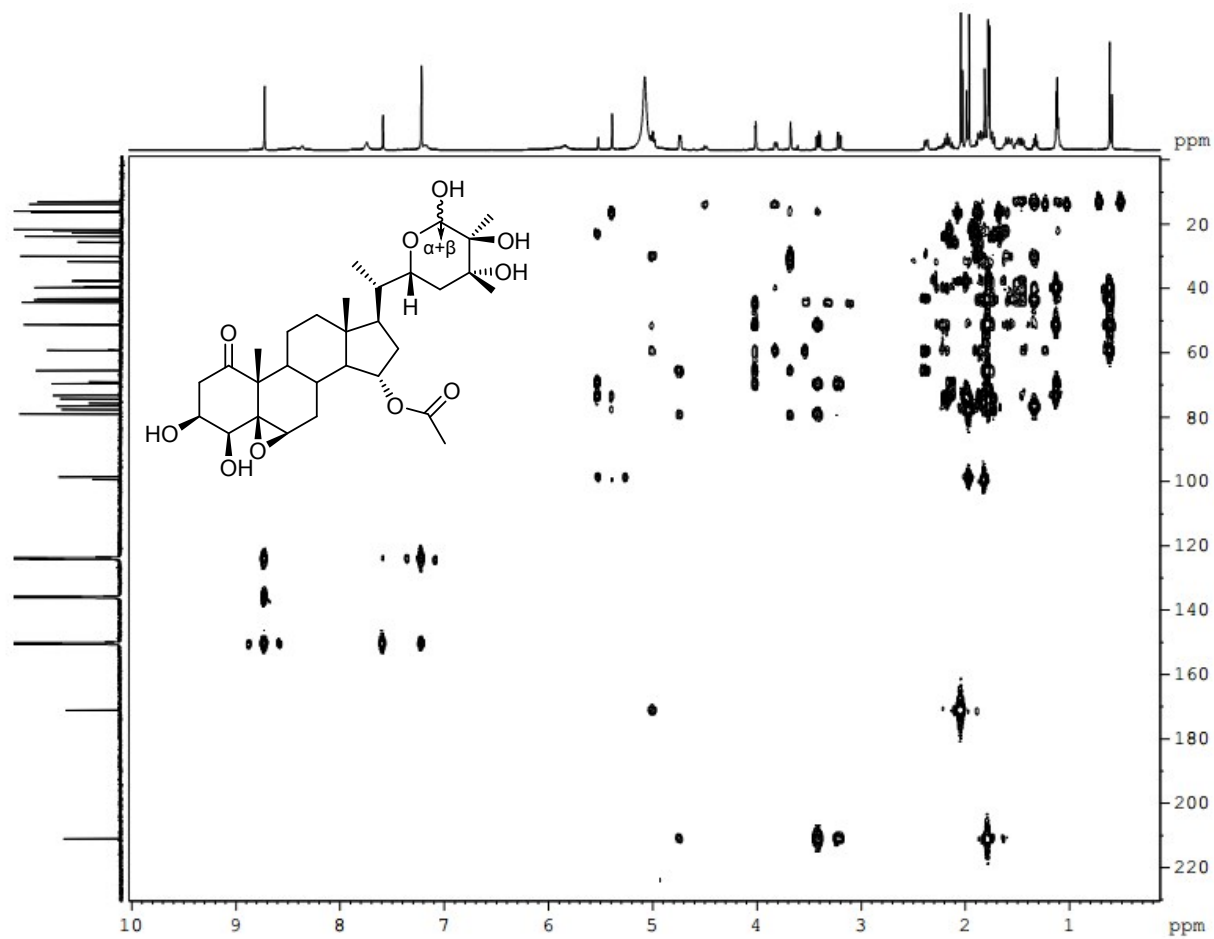

**Figure S33.** HRESIMS data of compound 4

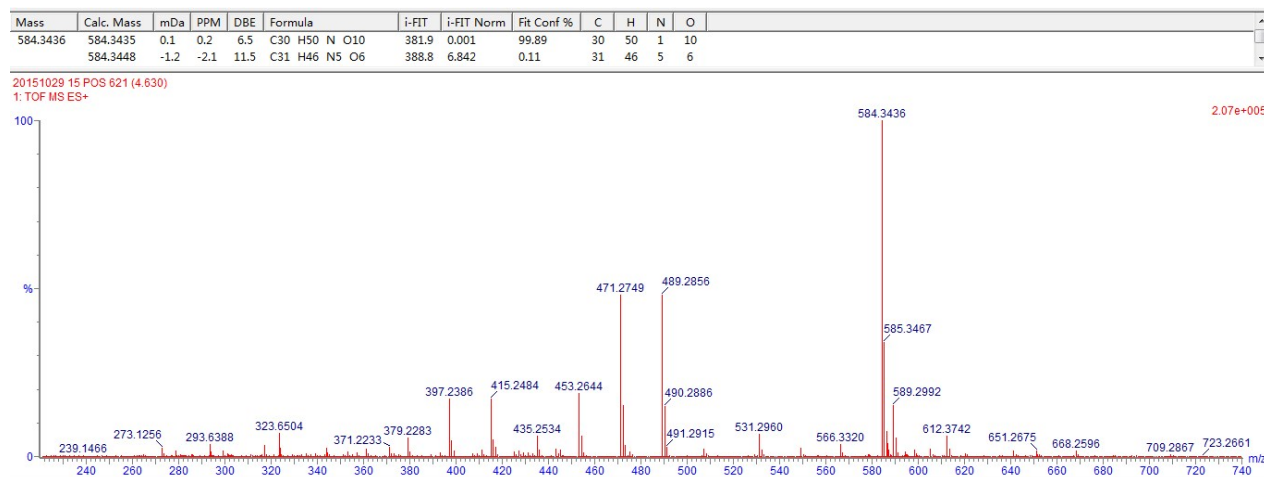

**Figure S34.** IR spectrum of compound 4

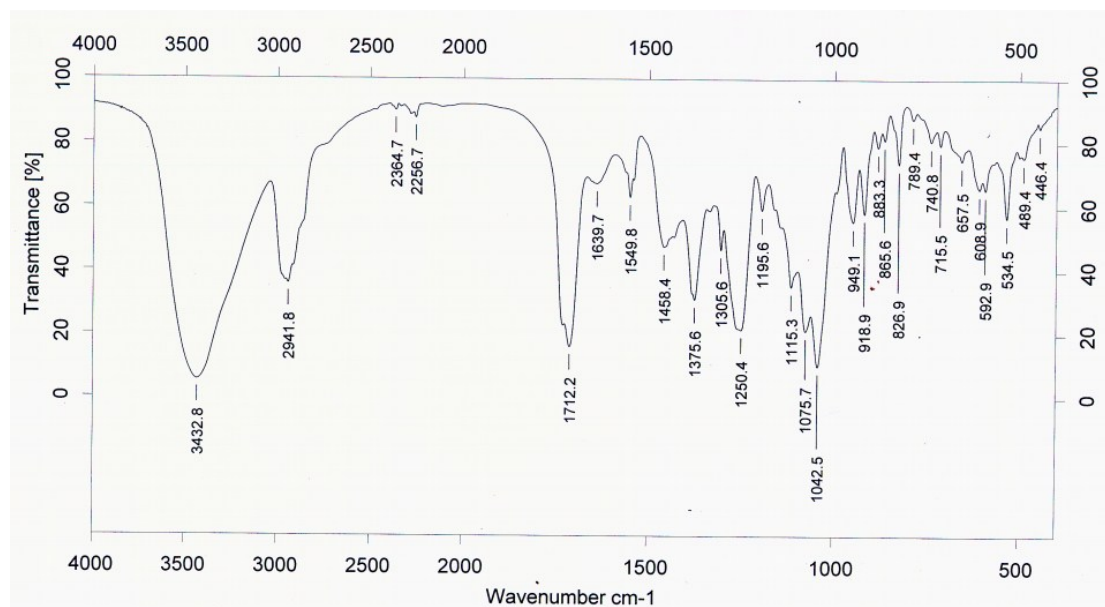

**Figure S35.** The HPLC chromatogram for the purity of compound **4**  
(refractive index detector)

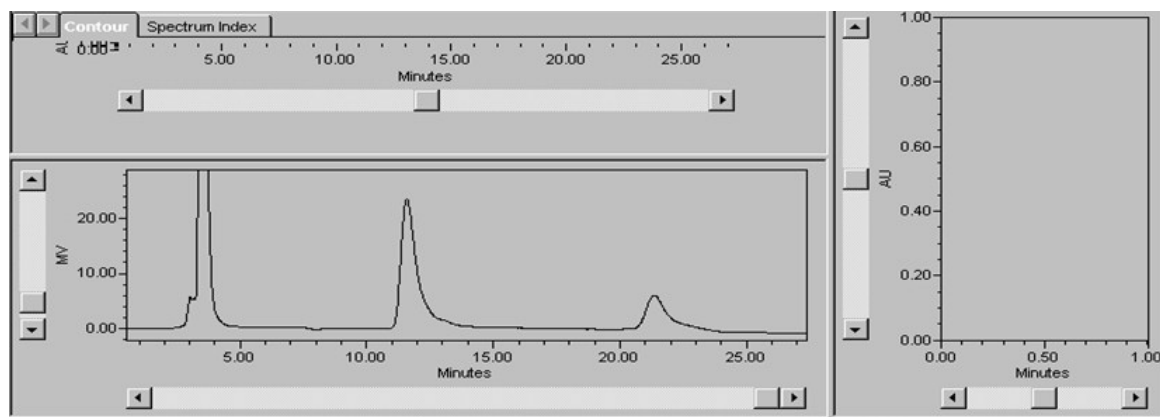

**Figure S36.** The UPLC-QTOF-MS chromatogram and MS/MS spectra for compound 4

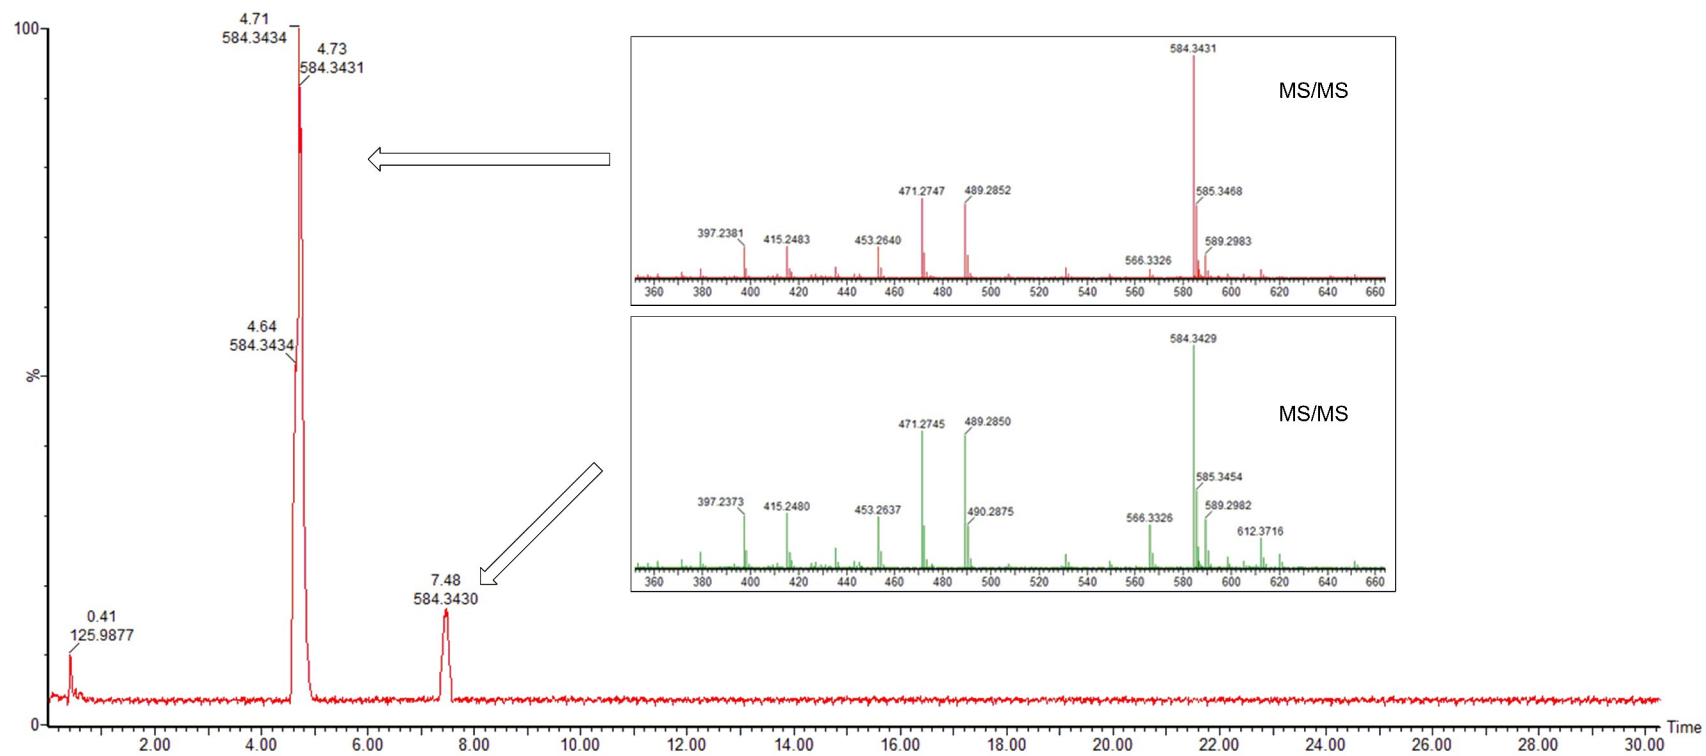

Supplement: c6ra07031k1.pdf [file c6ra07031k1.pdf]
